# Supplementary material for: Investigation into the crystal structure–dielectric property correlation in barium titanate nanocrystals of different sizes
Source: Royal Society of Chemistry journal article supplement (doi:10.1039/d3nr00350g), 2023-01-01
Supplement: d3nr00350g1.pdf [file d3nr00350g1.pdf]

## Supplementary Information

### Crystalline structure-dielectric property relationship in combustion-synthesized barium titanate nanocrystals with different sizes

Qiong Li <sup>1</sup>, Tianxiong Ju <sup>1</sup>, Ruipeng Li <sup>2</sup>, Shuang Wang <sup>3</sup>, Yongfang Yang <sup>3</sup>, Hatsuo Ishida <sup>1</sup>,  
Yeu-Wei Harn <sup>4</sup>, Jihua Chen <sup>5</sup>, Benjamin Hirt <sup>6</sup>, Alp Sehrioglu <sup>6</sup>,  
Zhiqun Lin <sup>7,\*</sup>, and Lei Zhu <sup>1,\*</sup>

<sup>1</sup> Department of Macromolecular Science and Engineering, Case Western Reserve University,  
Cleveland, Ohio 44106, United States

<sup>2</sup> National Synchrotron Light Source II, Brookhaven National Laboratory, Upton, New York  
11973, United States

<sup>3</sup> Institute of Polymer Science and Engineering, Hebei Key Laboratory of Functional Polymers,  
Hebei University of Technology, Tianjin 300130, P. R. China

<sup>4</sup> School of Materials Science and Engineering, Georgia Institute of Technology, Atlanta, Georgia  
30332, United States

<sup>5</sup> Center for Nanophase Materials Sciences, Oak Ridge National Laboratory, Oak Ridge,  
Tennessee 37831, United States

<sup>6</sup> Department of Materials Science and Engineering, Case Western Reserve University,  
Cleveland, Ohio 44106, United States

<sup>7</sup> Department of Chemical and Biomolecular Engineering, National University of Singapore,  
Singapore 117585, Singapore

\* Corresponding authors. Emails: [lxz121@case.edu](mailto:lxz121@case.edu) (L.Z.) and [z.lin@nus.edu.sg](mailto:z.lin@nus.edu.sg) (Z.L.)

## 1. FTIR study of arBTO nanocrystals

FTIR measurements were performed for arBTO50-arBTO500 nanocrystals. The measurements were carried out at the ambient condition. The arBTO nanocrystals were dried in a vacuum oven at 80 °C overnight prior to the measurement to reduce the moisture absorption. Besides the Ti-O peak at 486  $\text{cm}^{-1}$  and the Ba-Ti-O peak at 1450  $\text{cm}^{-1}$ , diamond crystal absorption at 1900-2240  $\text{cm}^{-1}$  and CO<sub>2</sub> peaks around 2346  $\text{cm}^{-1}$  were also observed. No other absorption bands were seen from other chemical substances. With increasing the particle size, increased light scattering was noticed above 2000  $\text{cm}^{-1}$ .

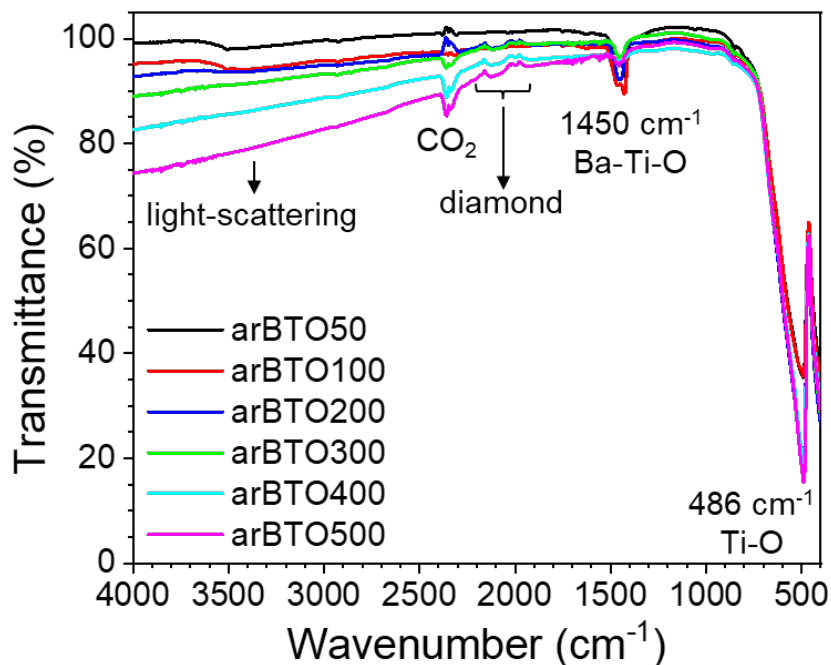

**Fig. S1.** ATR FTIR spectra of arBTO50-arBTO500 nanocrystals using the single-bounce diamond crystal.

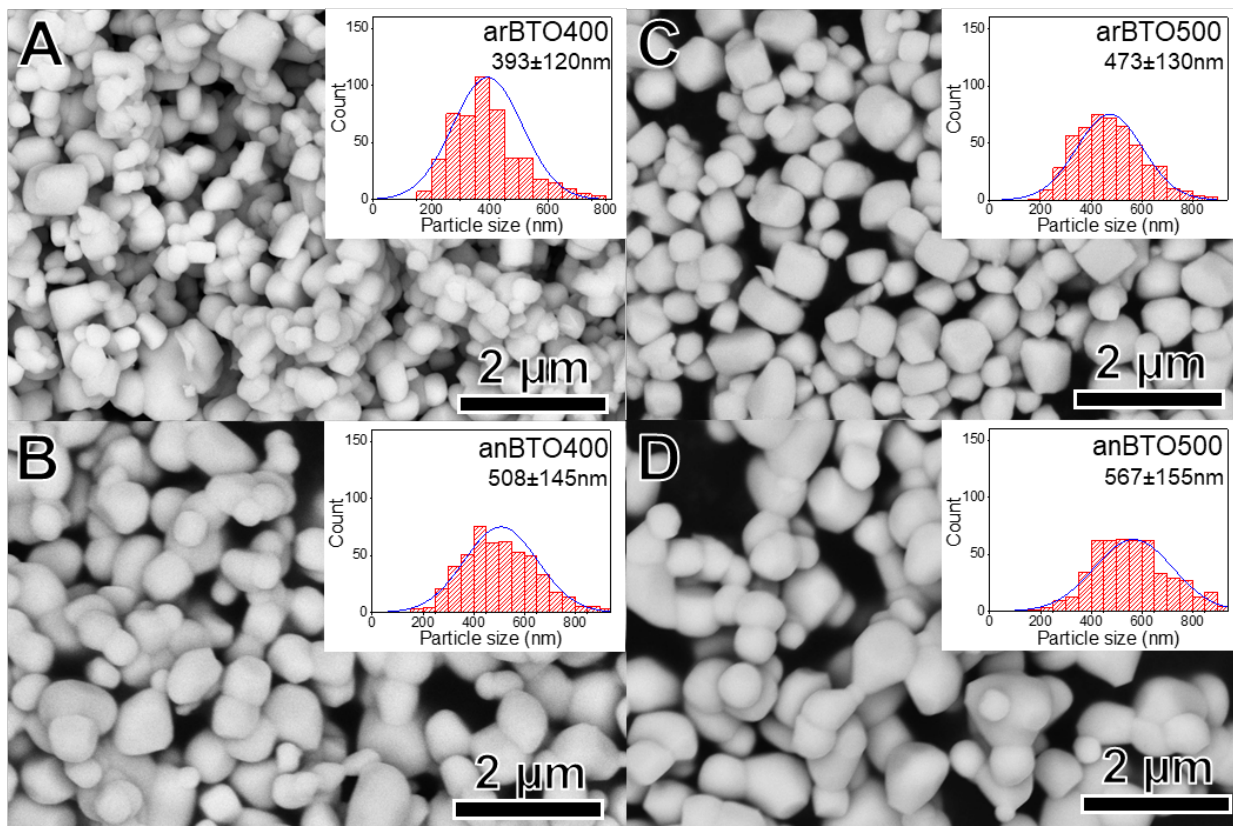

**Fig. S2.** SEM micrographs of (A) arBTO400, (B) anBTO400, (C) arBTO500, (D) anBTO500. The insets show particle-size histograms and the mean particle size with error (i.e., mean  $\pm$  standard deviation).

## 2. DSC and SEM analyses to determine the optimal annealing temperature

SEM micrographs of arBTO400, anBTO400, arBTO500, and anBTO500 are shown in Figs. S2A-D, respectively. The insets show the particle size histograms obtained by counting over 500 particles for each sample. The averaged particle sizes were  $393 \pm 120$  nm for arBTO400 and  $473 \pm 130$  nm for arBTO500 nanocrystals, while the corresponding  $950$  °C-annealed particle sizes were  $508 \pm 145$  nm for anBTO400 and  $567 \pm 155$  nm for anBTO500 nanocrystals, which were equivalent to 29% and 20% increase, respectively.

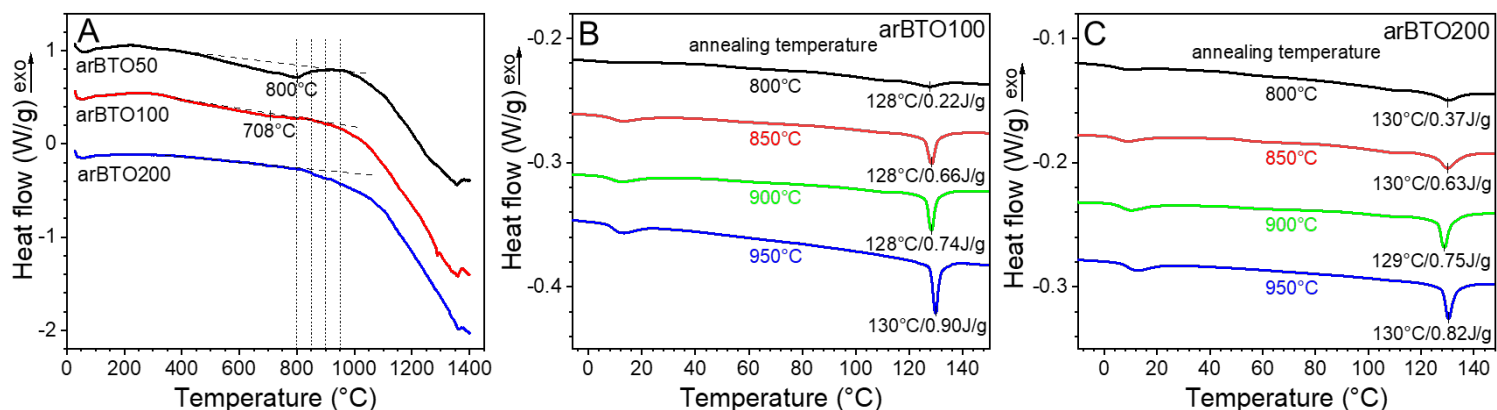

**Fig. S3.** (A) High-temperature DSC of arBTO50, arBTO100, and arBTO200 nanocrystals. Heating curves of conventional DSC for (B) arBTO100 (C) arBTO200 after 800-950 °C annealing for 72 h.

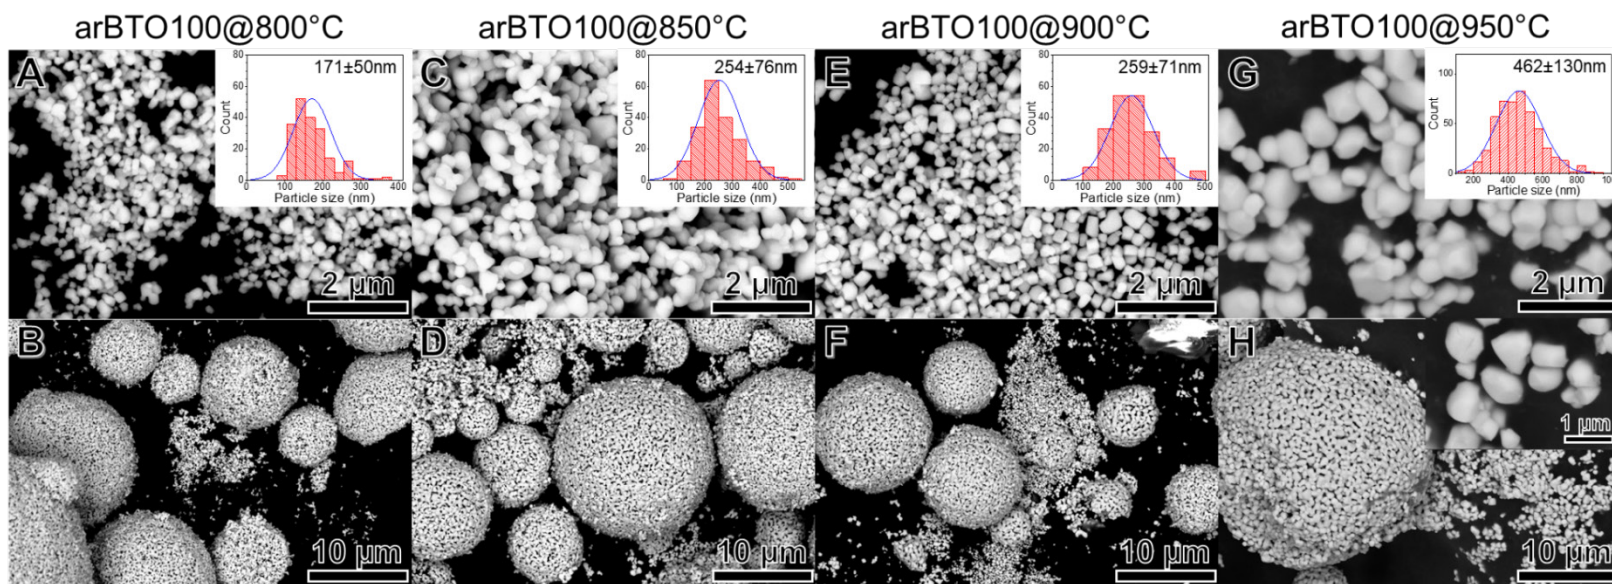

**Fig. S4.** SEM micrographs of arBTO100 nanocrystals after annealing at (A) 800 °C, (C) 850 °C, (E) 900 °C, (G) 950 °C (i.e., anBTO100) for 72 h. The corresponding low magnification micrographs are shown in (B, D, F, H), respectively. The insets show particle-size histograms and the averaged particle size with error (i.e., mean  $\pm$  standard deviation).

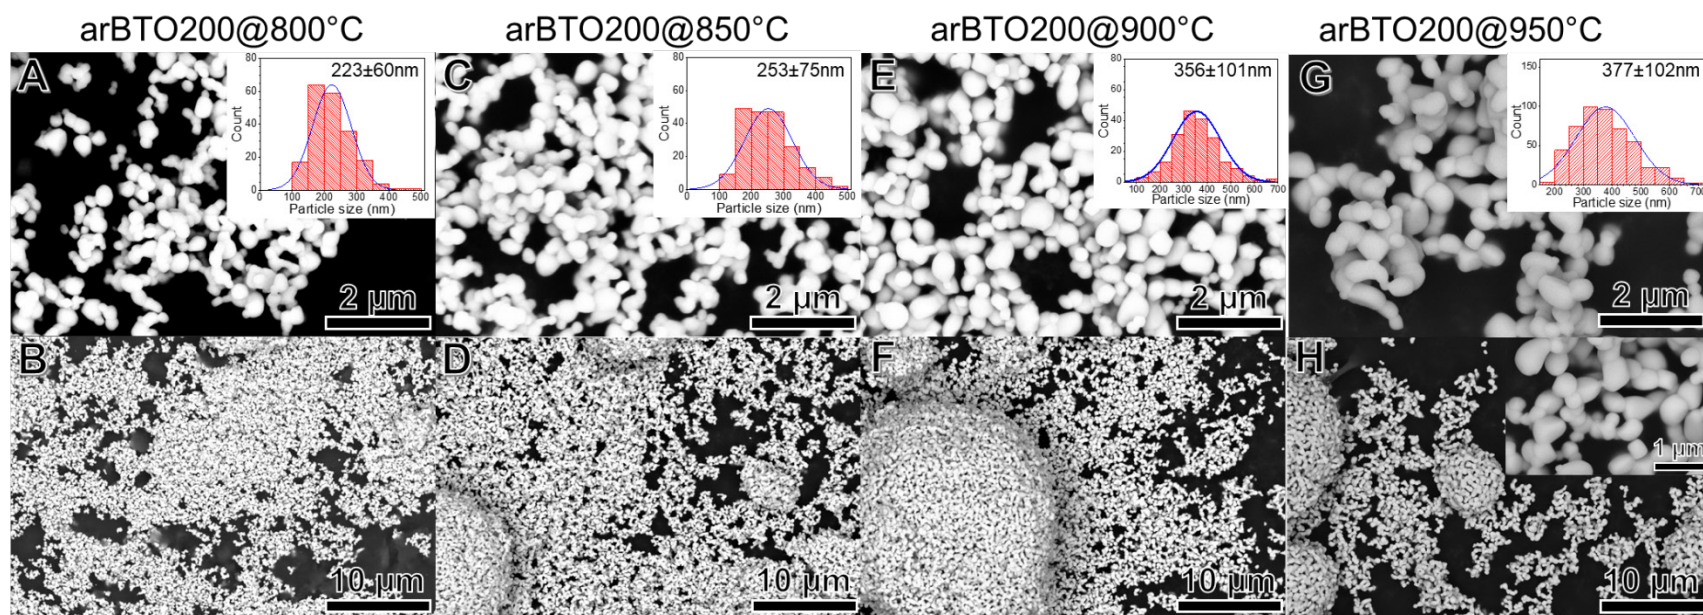

**Fig. S5.** SEM micrographs of arBTO200 nanocrystals after annealing at (A) 800 °C, (C) 850 °C, (E) 900 °C, and (G) 950 °C for 72 h. The corresponding low magnification micrographs are shown in (B, D, F, H), respectively. The insets show particle-size histograms and the averaged particle size with error (i.e., mean  $\pm$  standard deviation).

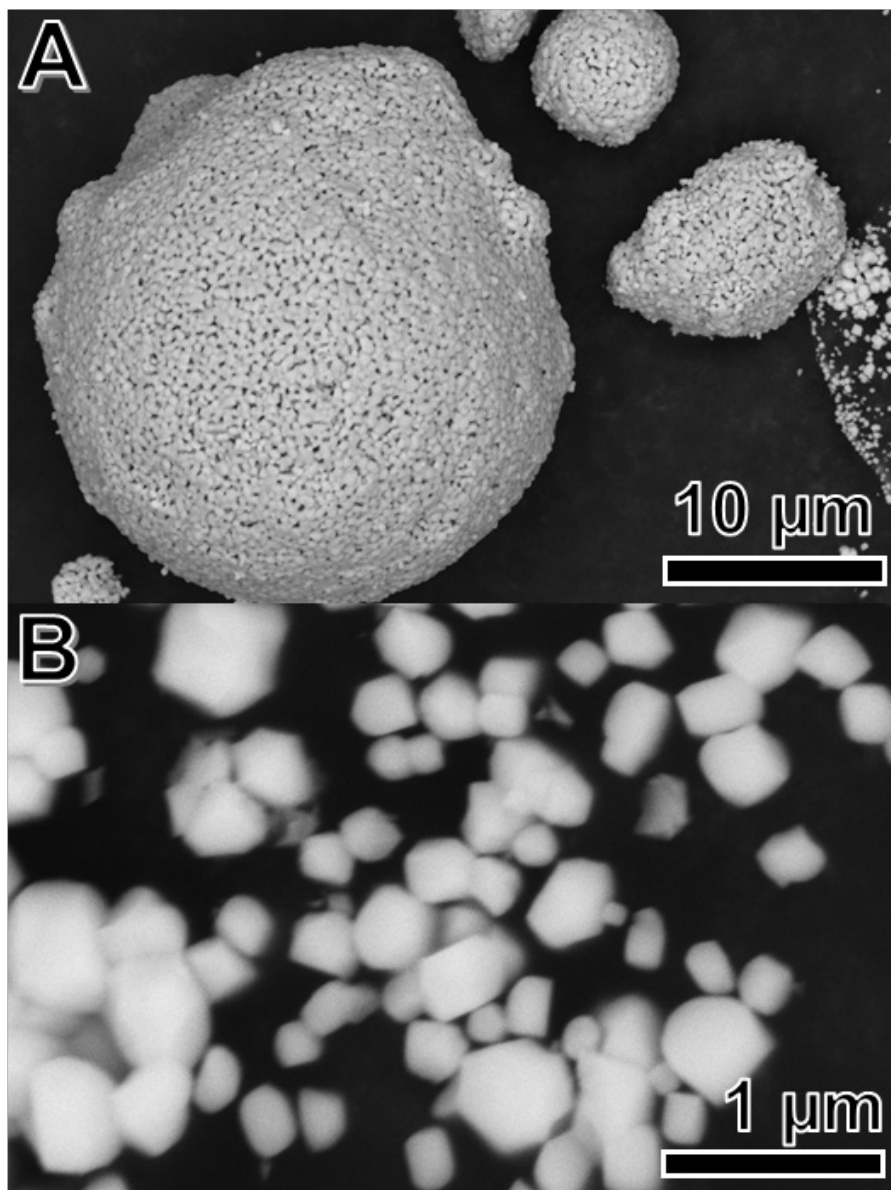

**Fig. S6.** SEM micrographs of arBTO50 thermally annealed at 950 °C for 72 h, i.e., anBTO50: (A) low and (B) high magnifications. Some particles have sintered into ~800 nm particles.

### 3. XRD characterization of BTO nanocrystals

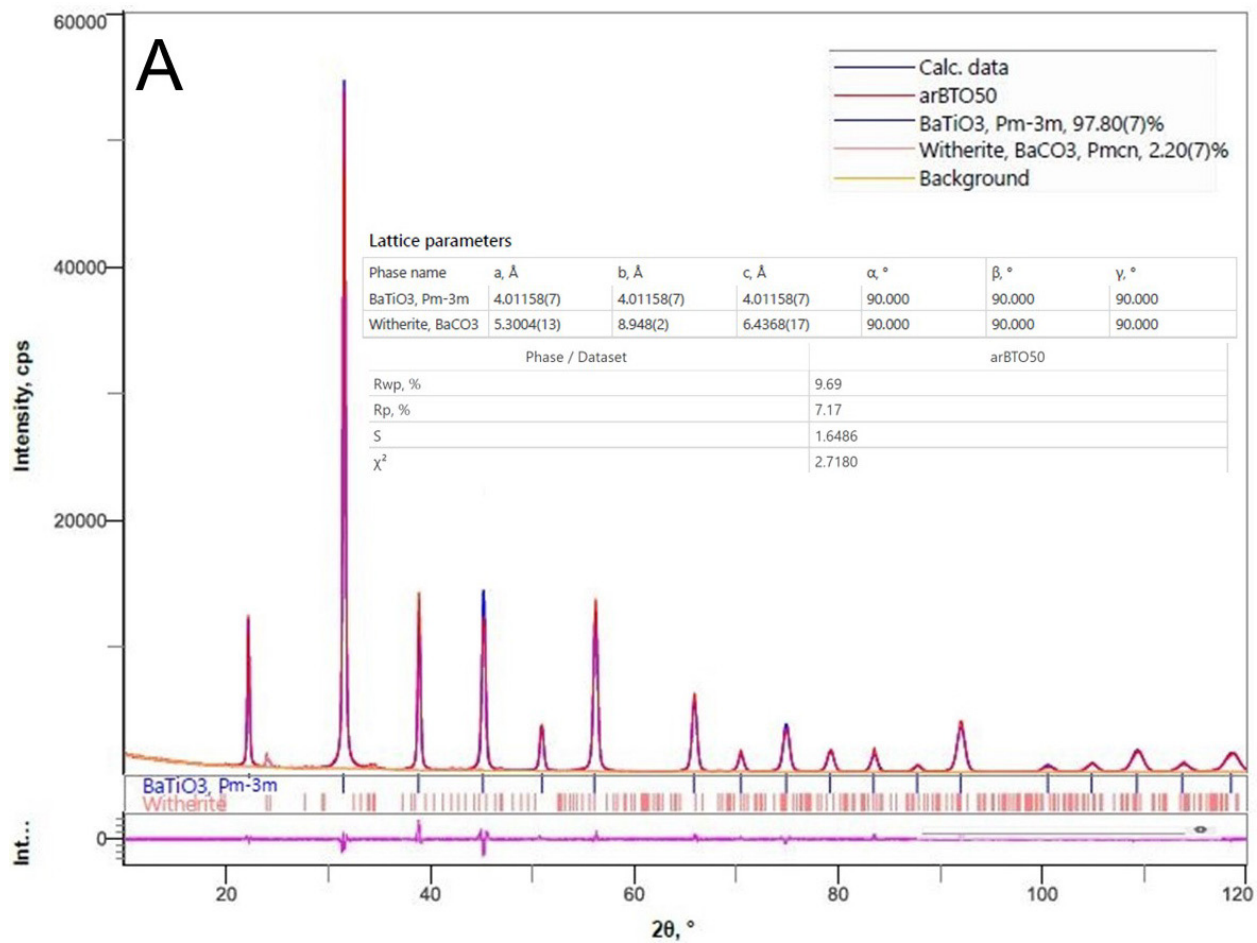

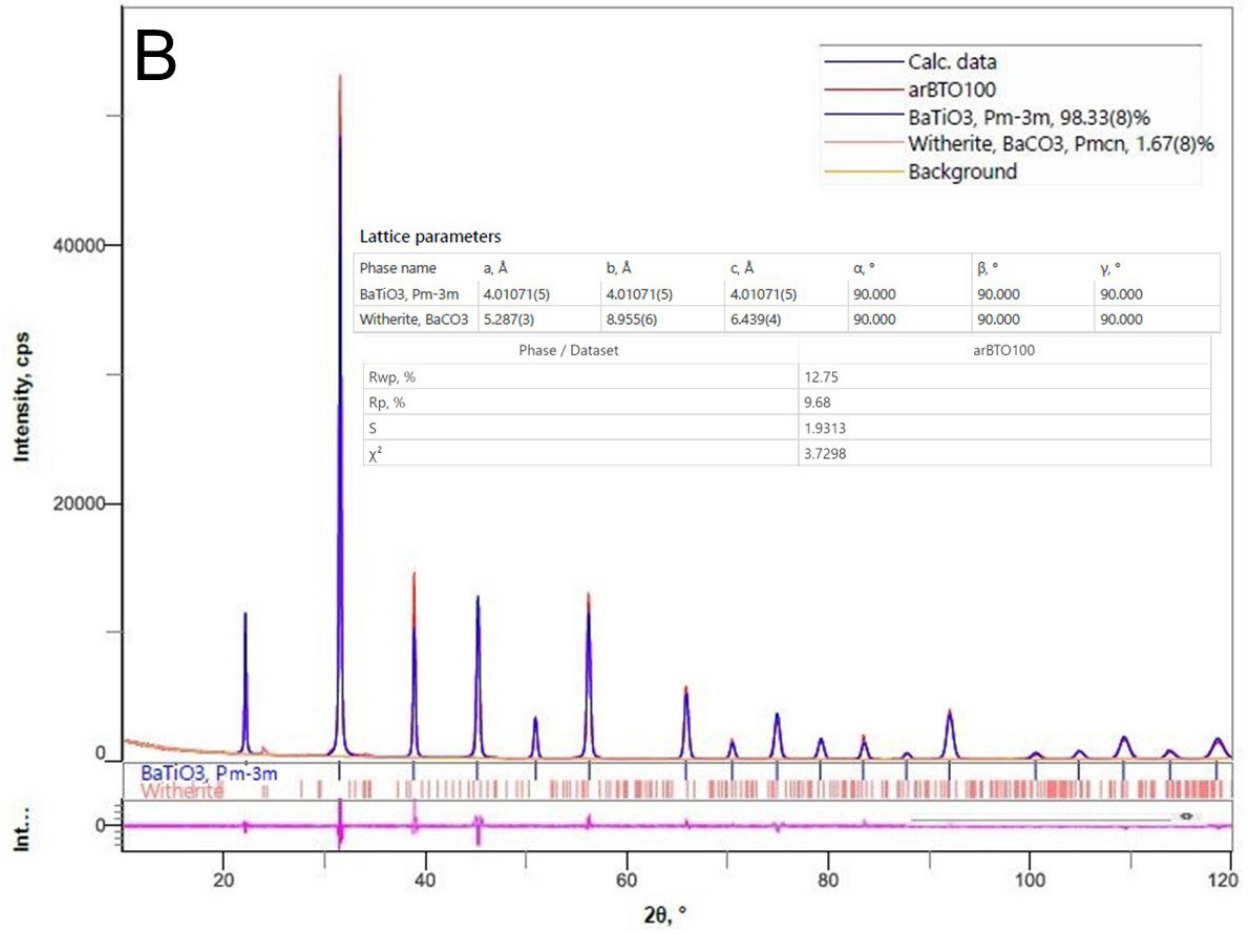



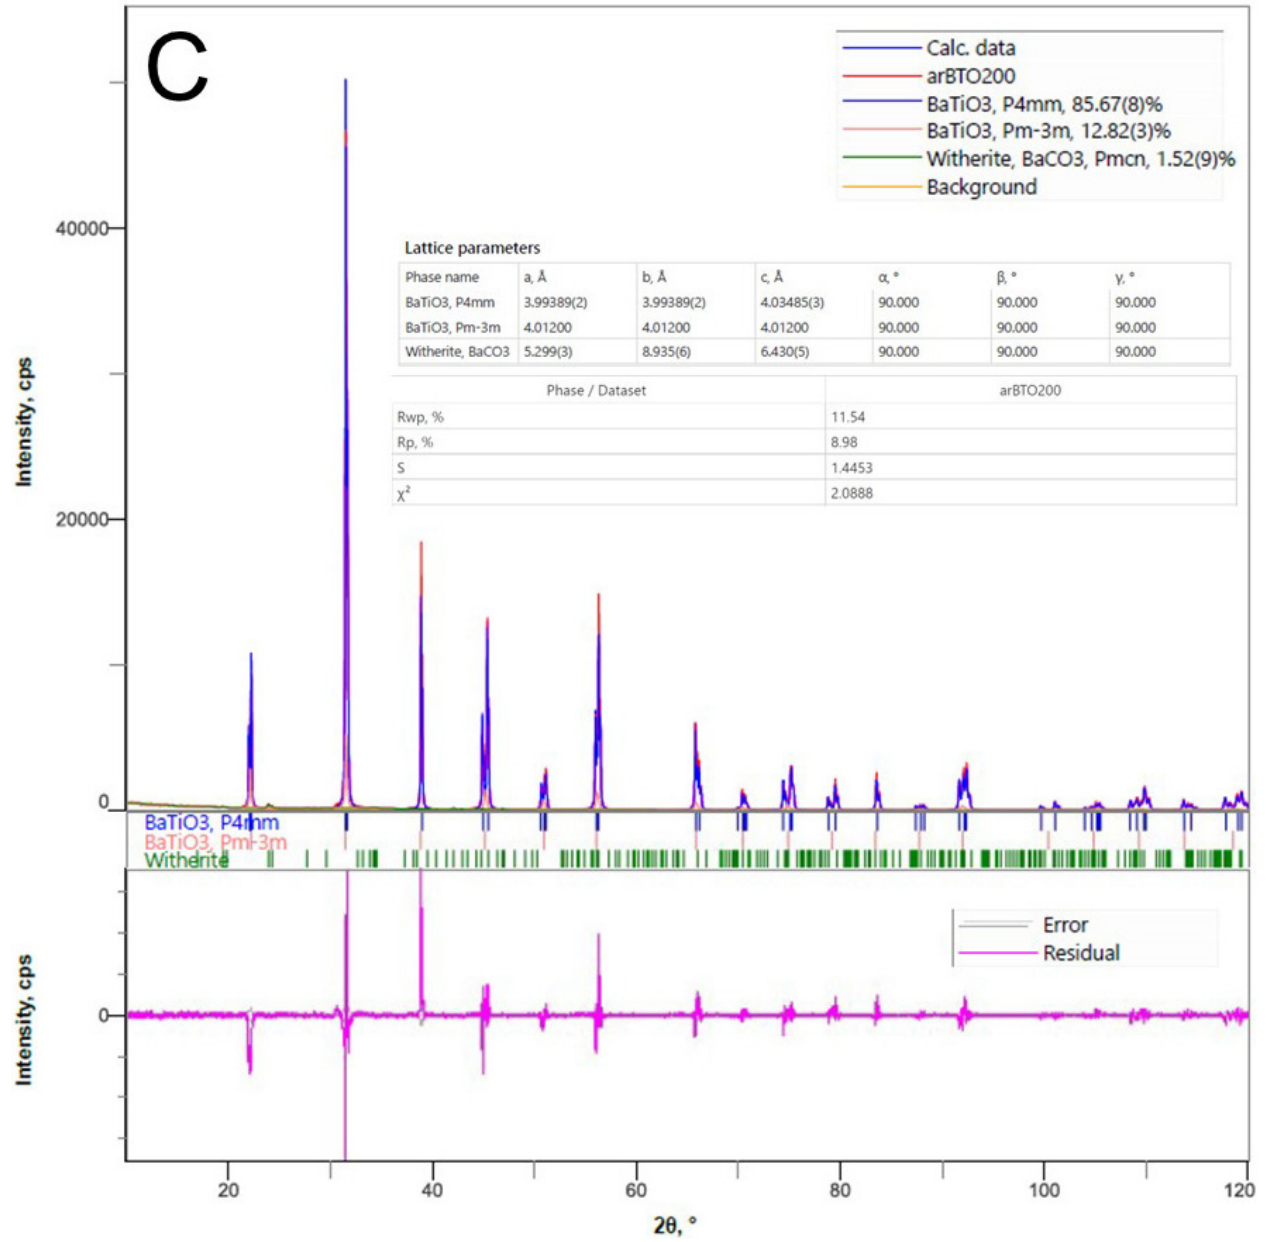

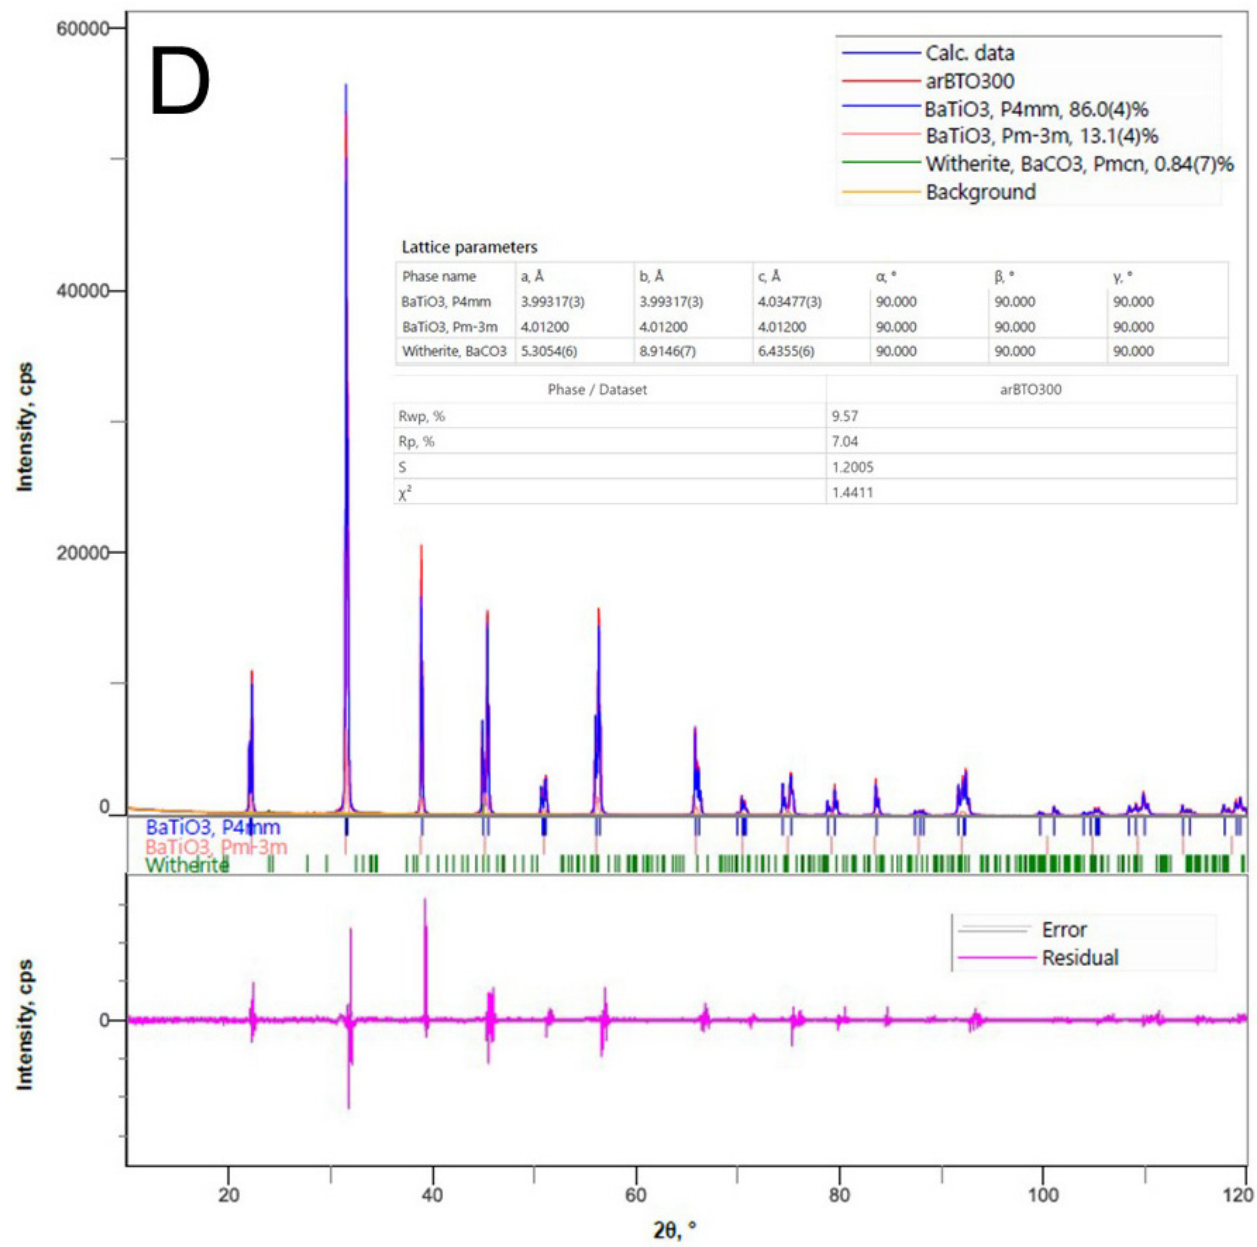

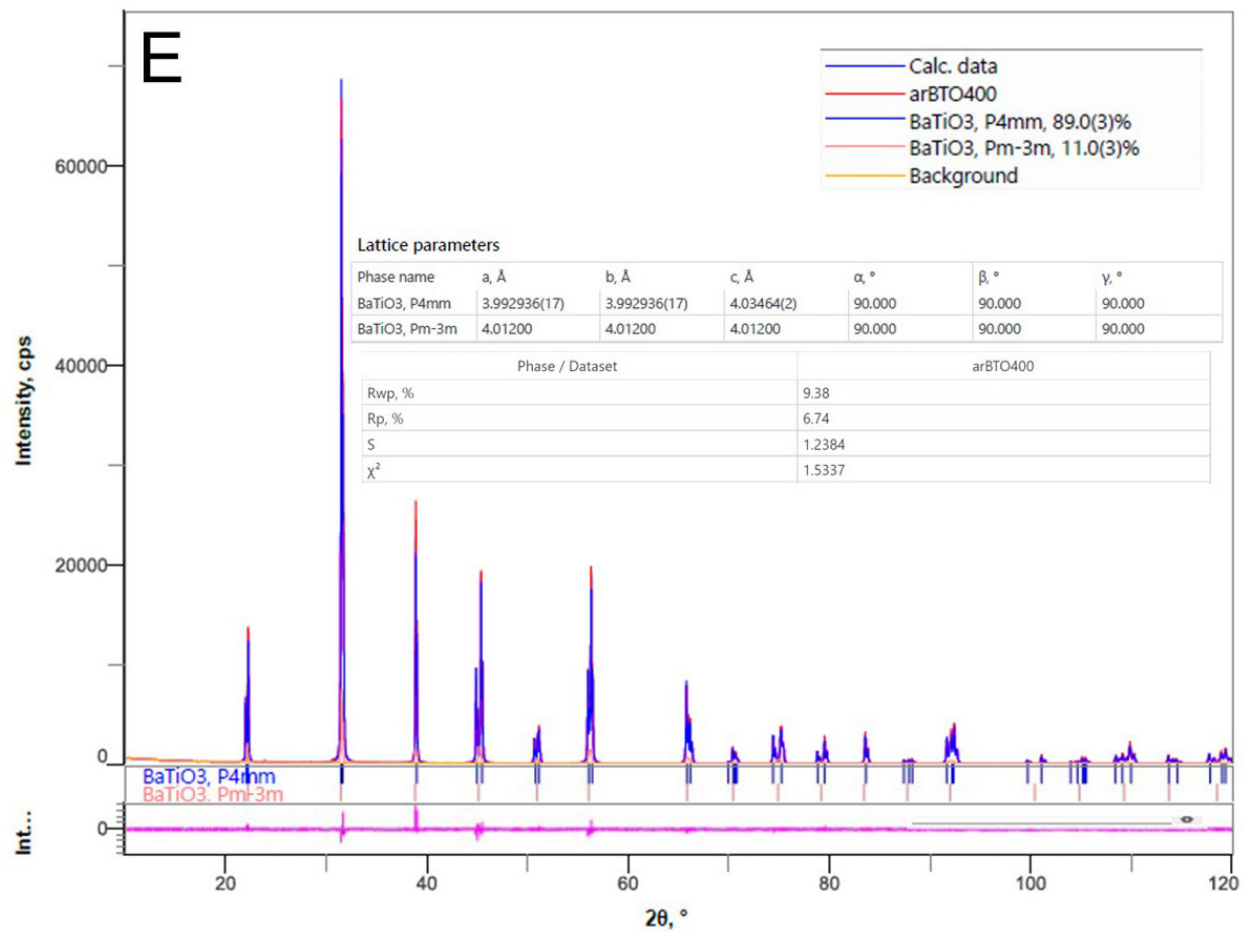

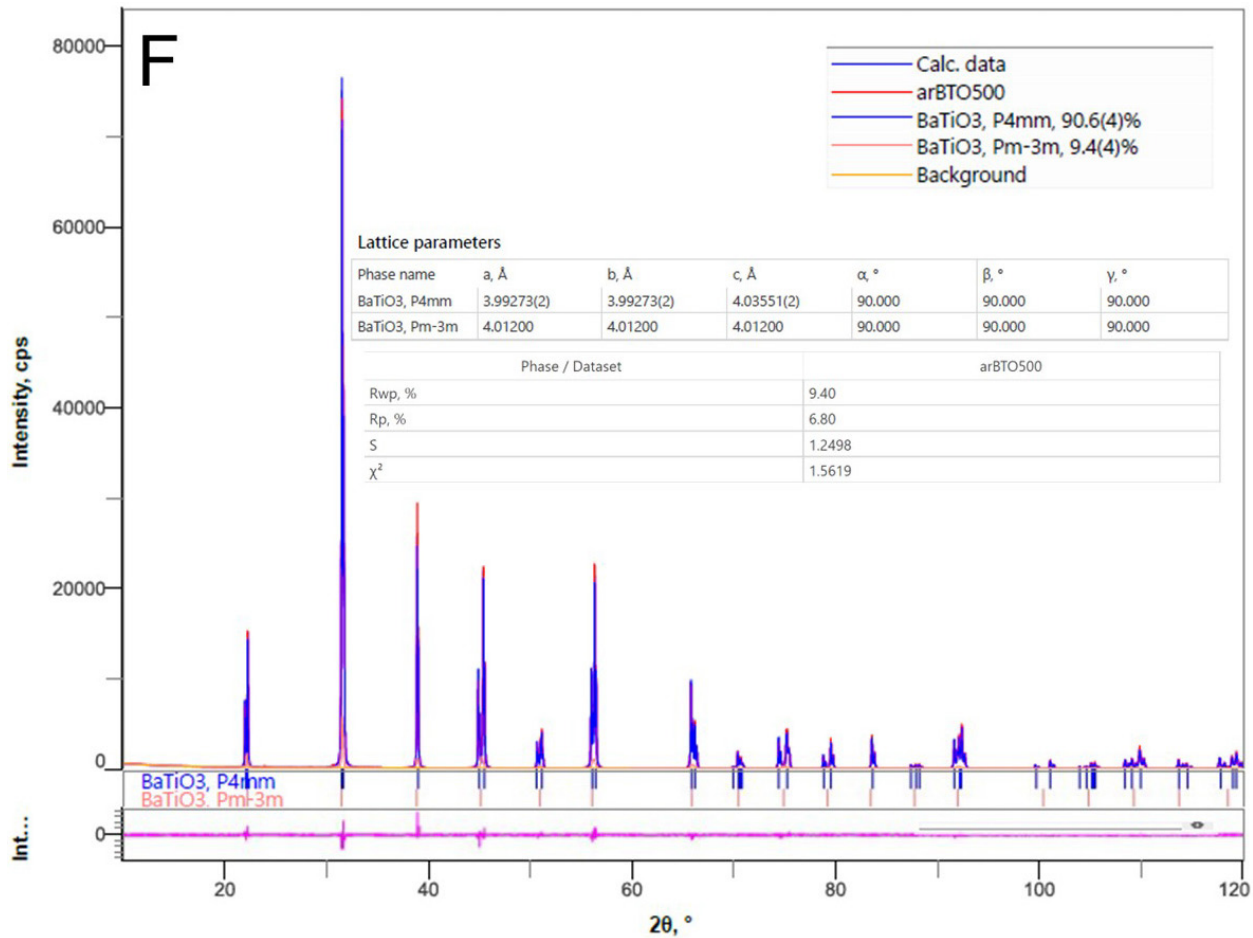

**Fig. S7.** Powder XRD profiles and Rietveld fitting results for arBTO500 nanocrystals at room temperature. The contents of tetragonal and cubic BaTiO<sub>3</sub>, and witherite BaCO<sub>3</sub> are shown. The fitted lattice parameters for different crystal structures are presented.

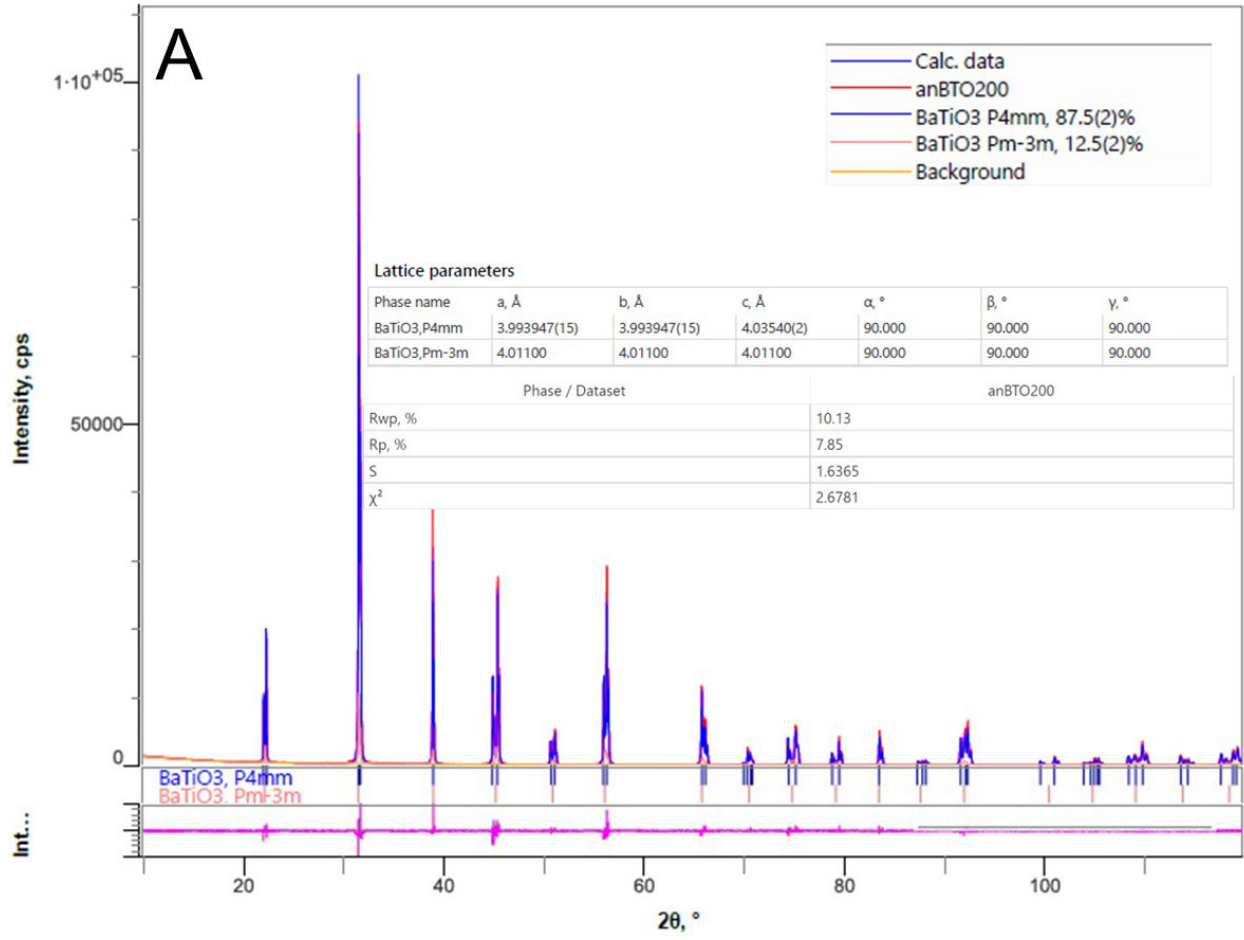

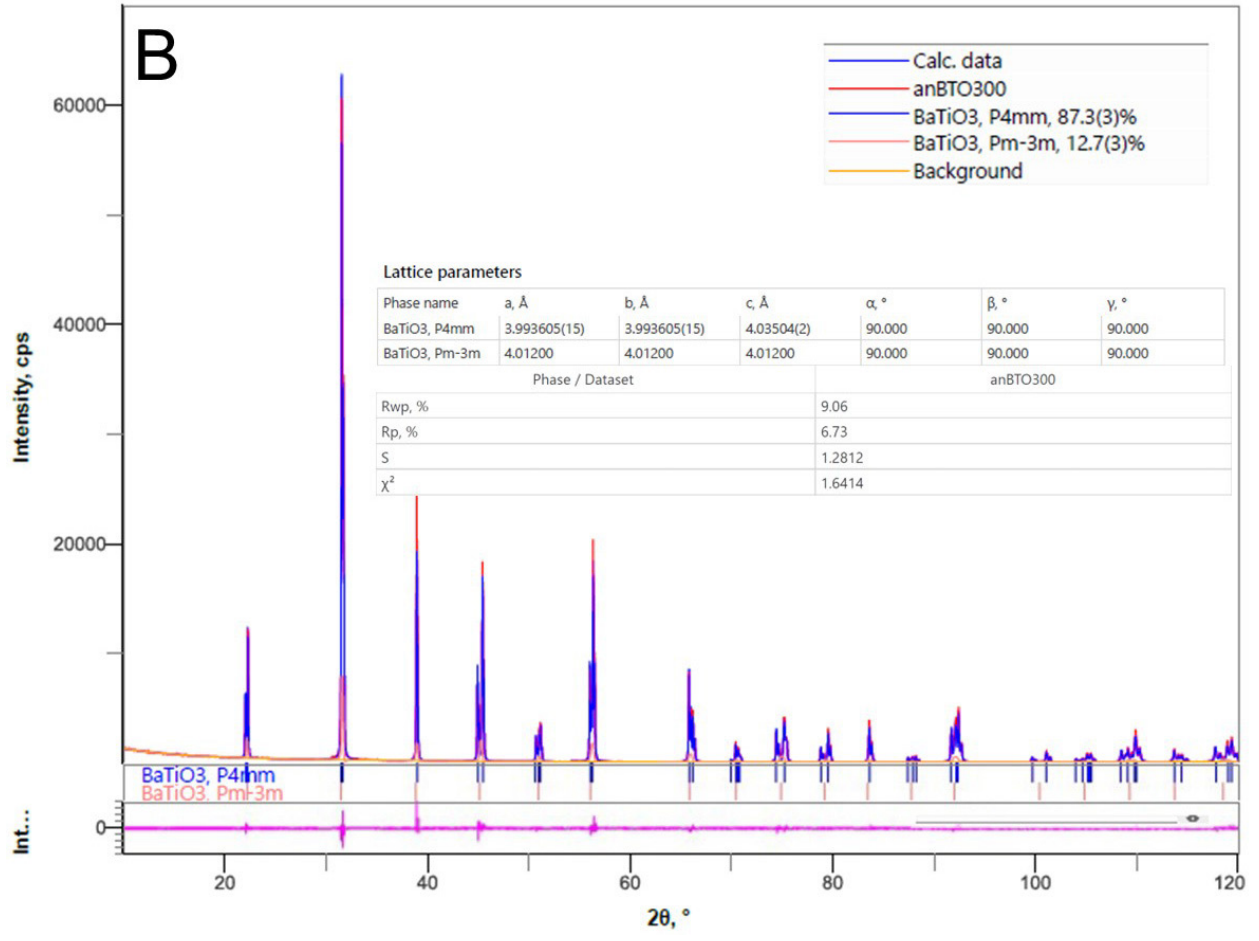

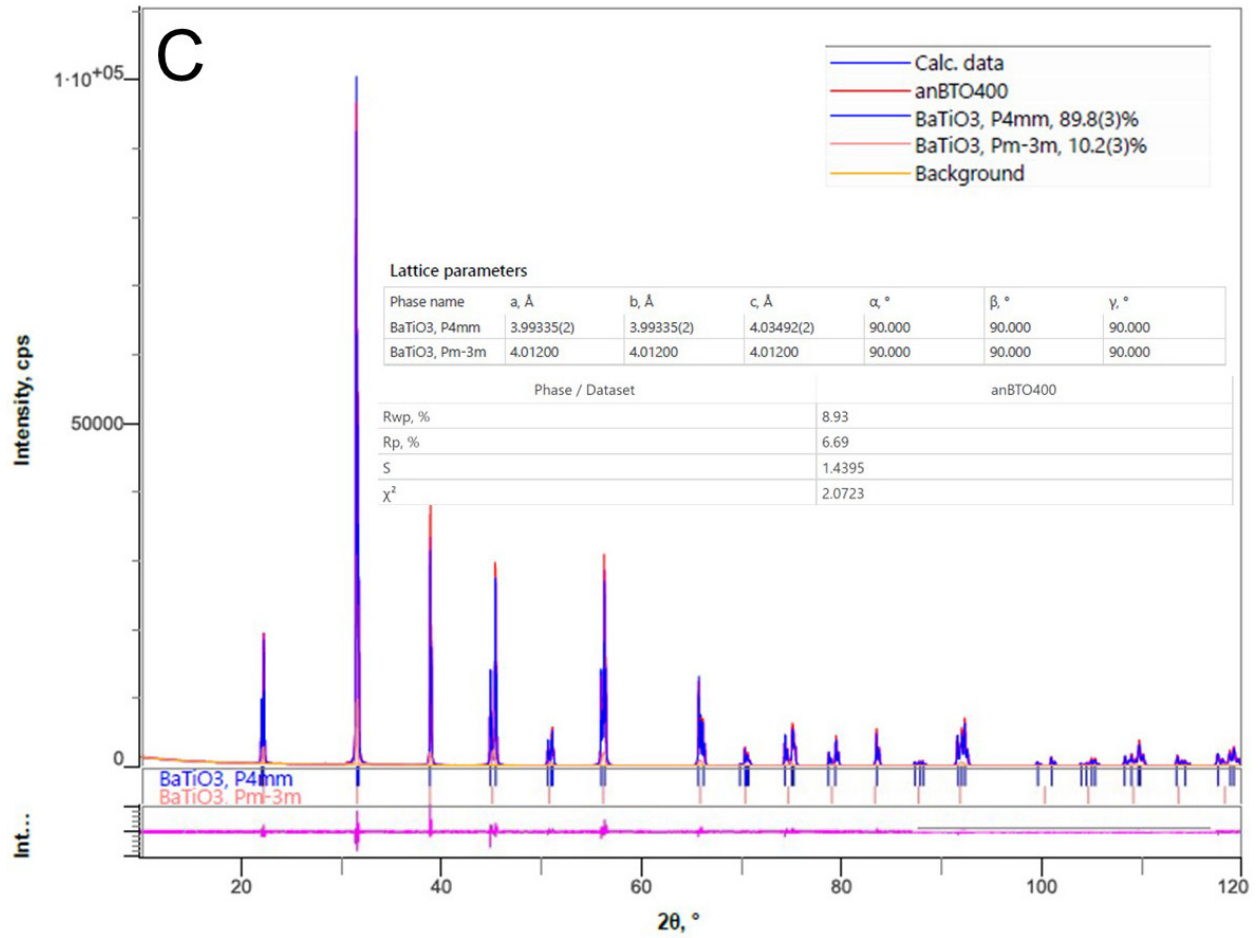

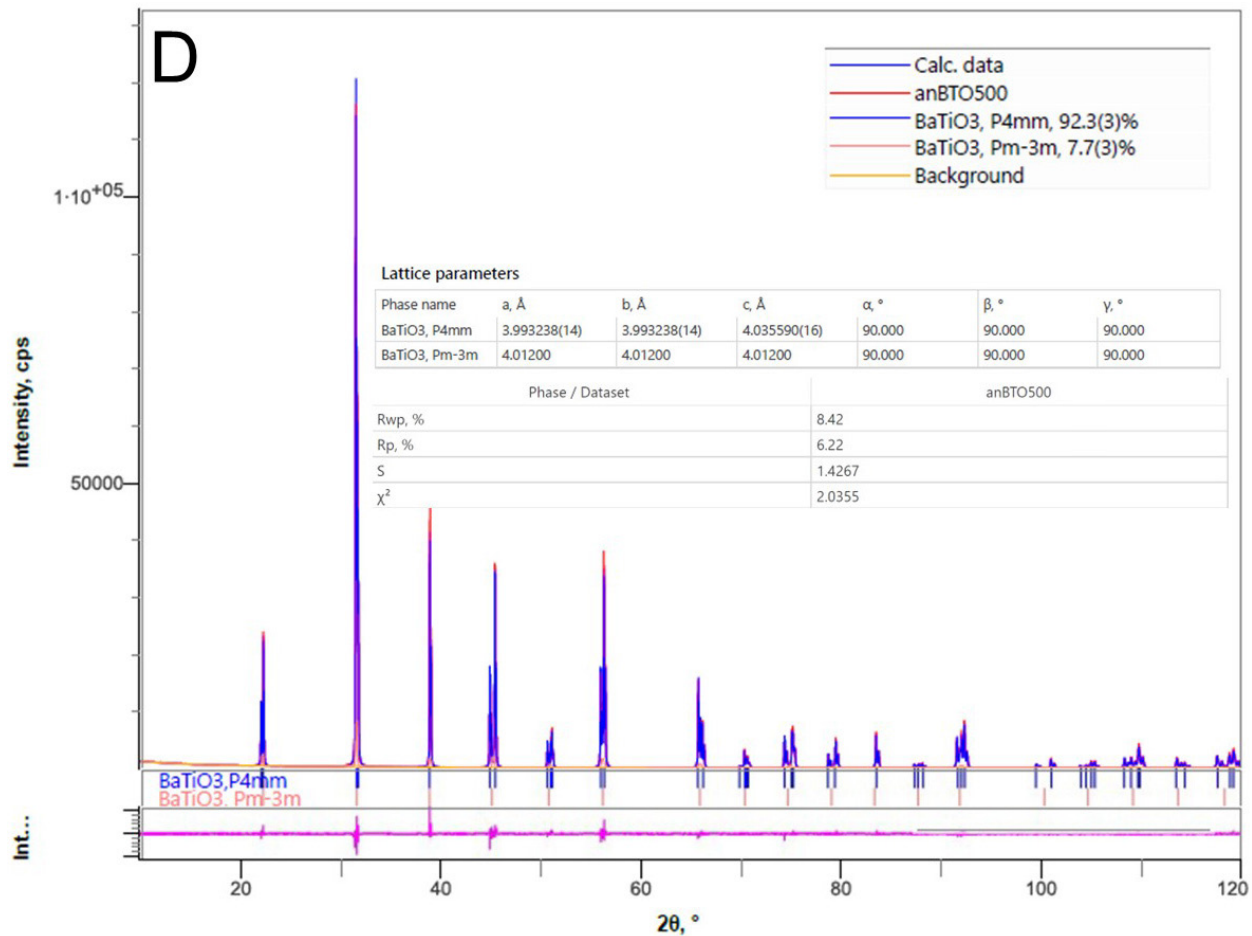

**Fig. S8.** Powder XRD profiles and Rietveld fitting results for arBTO50-arBTO500 nanocrystals at room temperature. The contents of tetragonal and cubic BaTiO<sub>3</sub>, and witherite BaCO<sub>3</sub> are shown. The fitted lattice parameters for different crystal structures are presented.



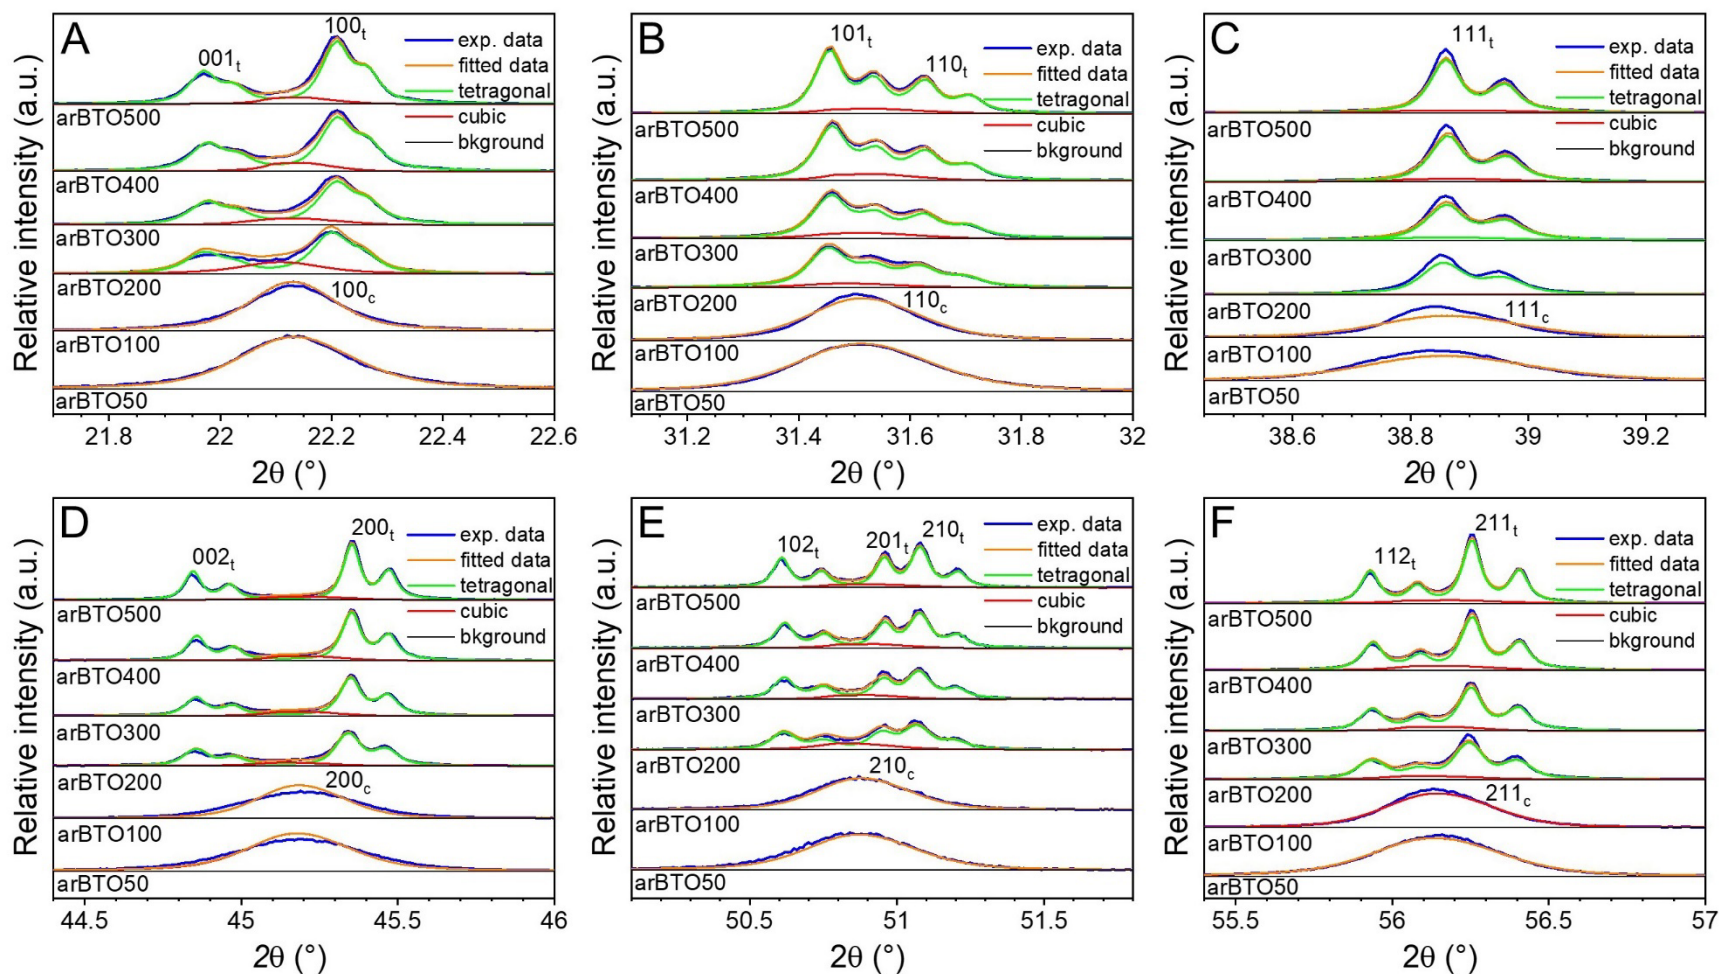

**Fig. S9.** Detailed Rietveld fitting results for the first 6 reflections of arBTO50-arBTO500 nanocrystals at room temperature. The splitting of tetragonal peaks is attributed to the Cu  $K_{\alpha 1}$  and  $K_{\alpha 2}$  radiations in the X-ray source.

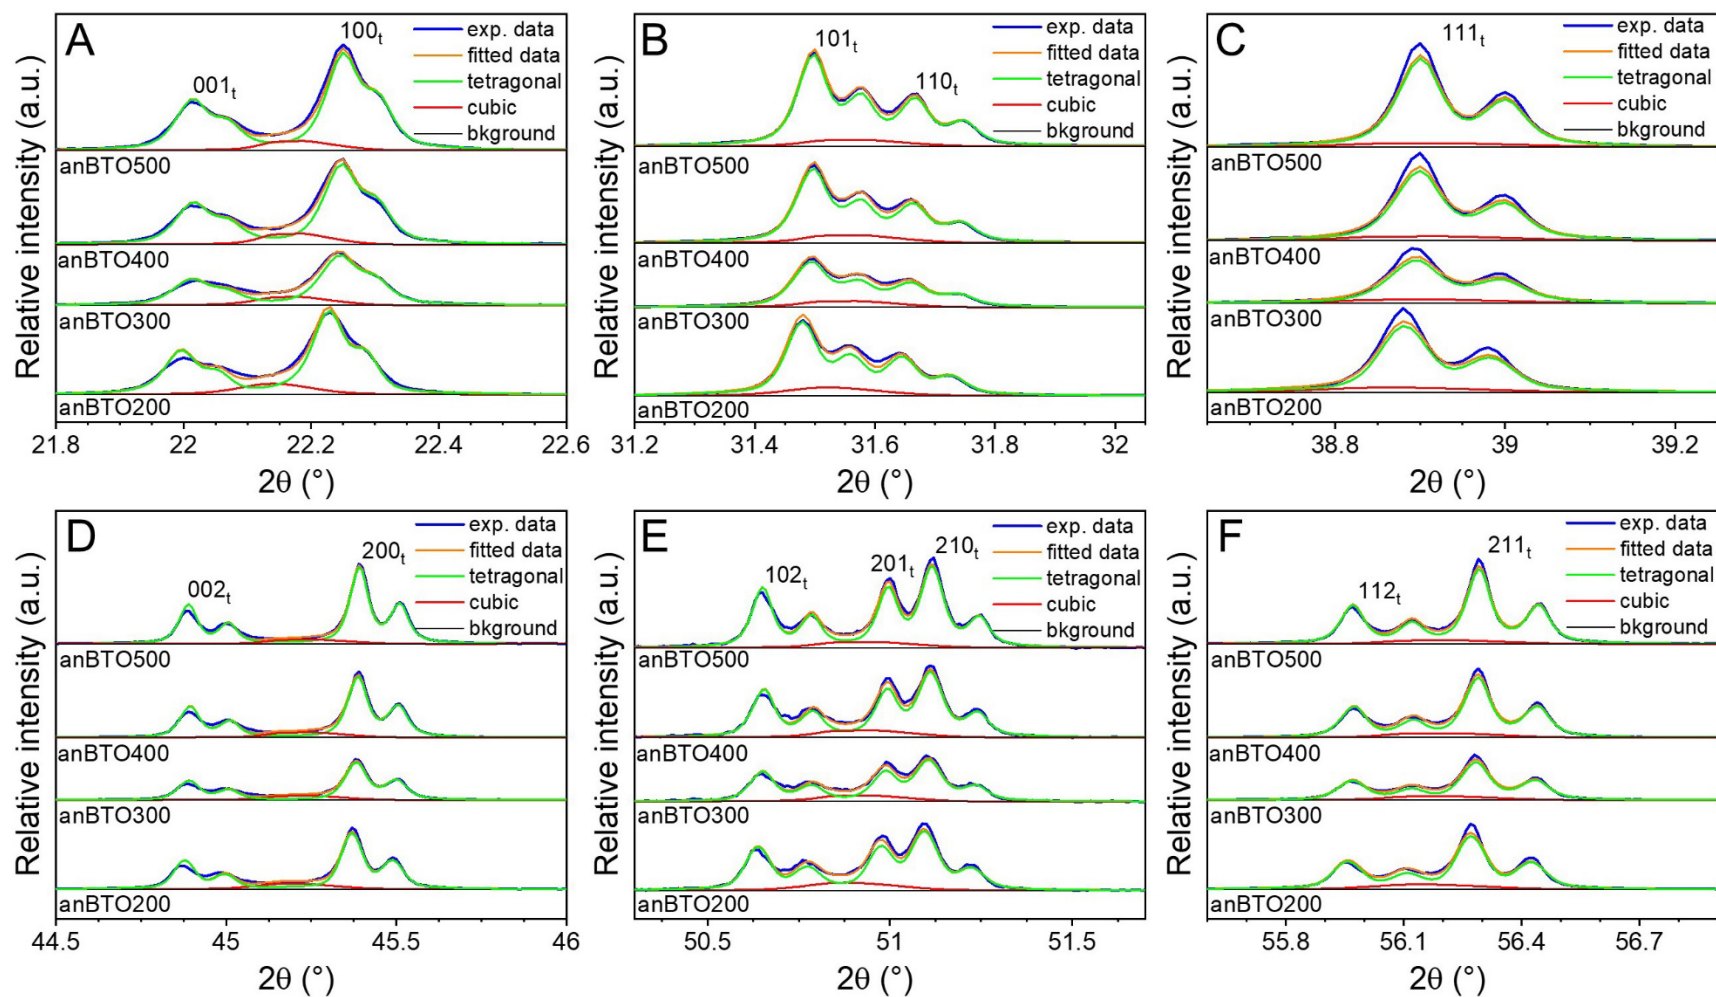

**Fig. S10.** Detailed Rietveld fitting results for the first 6 reflections of anBTO200-anBTO500 nanocrystals at room temperature. The splitting of tetragonal peaks is attributed to the Cu  $K_{\alpha 1}$  and  $K_{\alpha 2}$  radiations in the X-ray source.

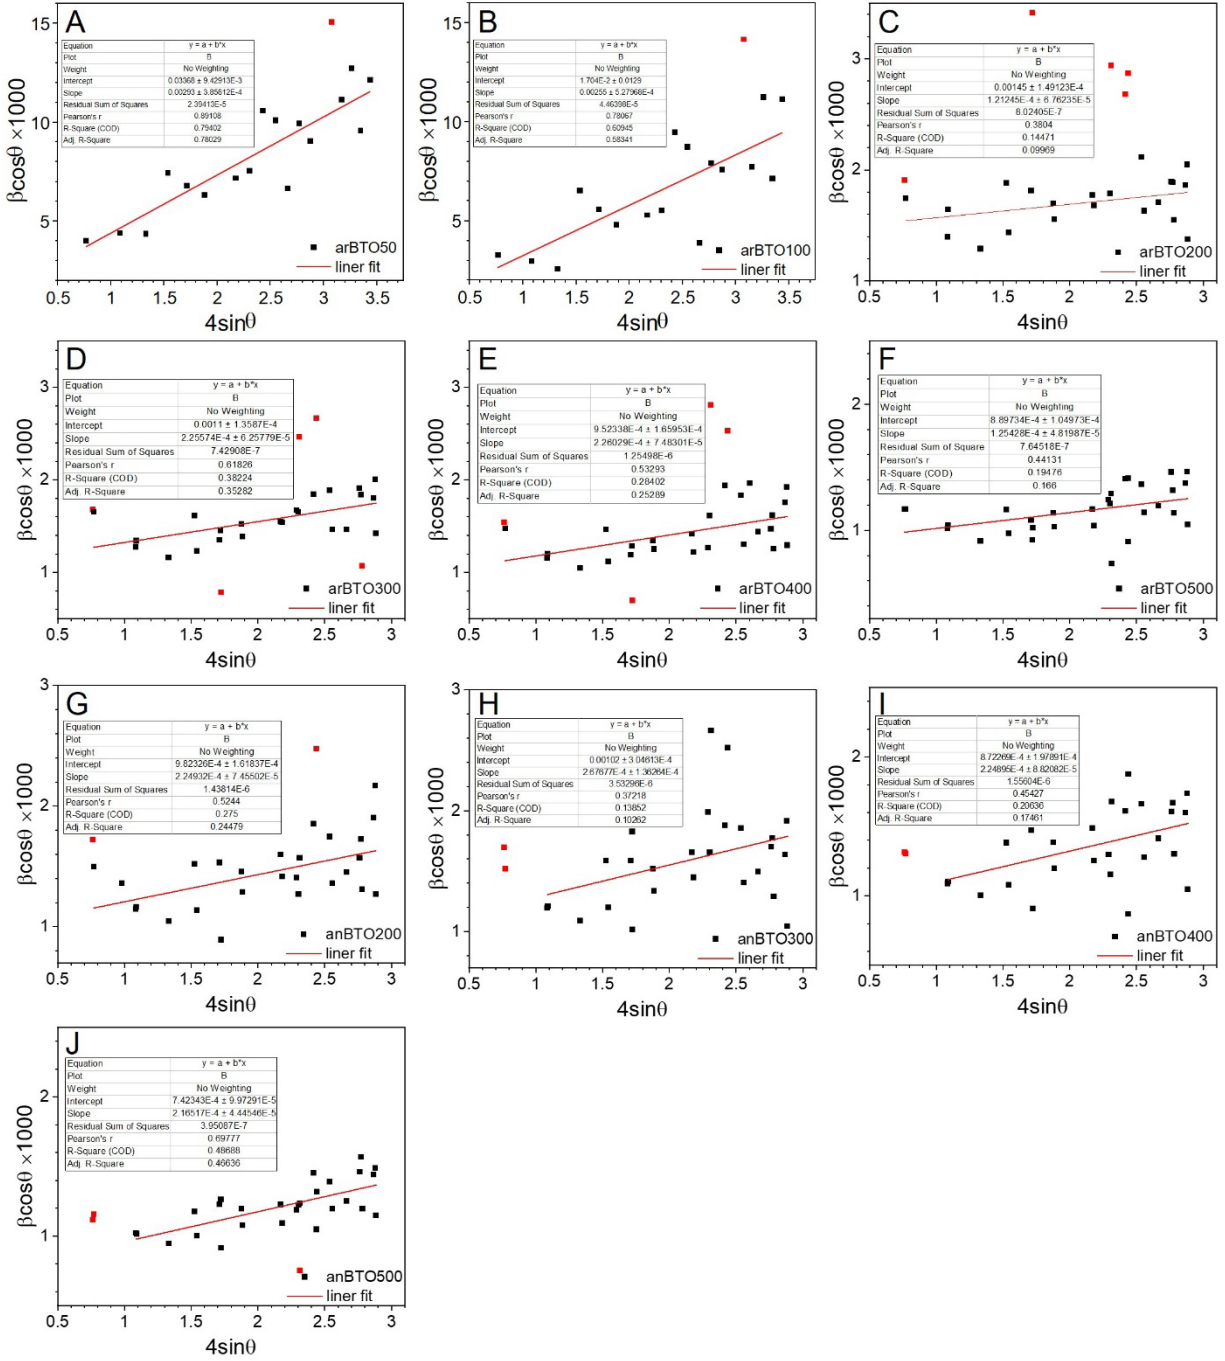

**Fig. S11.** Williamson-Hall plots for (A) arBTO50, (B) arBTO100, (C) arBTO200, (D) arBTO300, (E) arBTO400, (F) arBTO500, (G) anBTO200, (H) anBTO300, (I) anBTO400, and (J) anBTO500. The red data points are masked for the linear fitting.

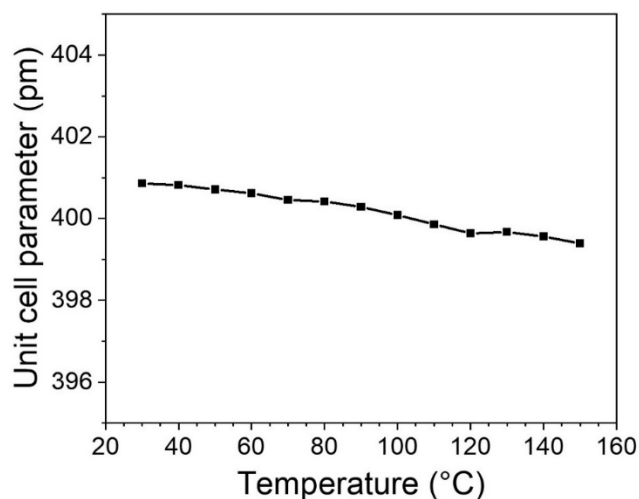

**Fig. S12.** Unit cell parameter as a function of temperature for arBTO100 during the heating process.

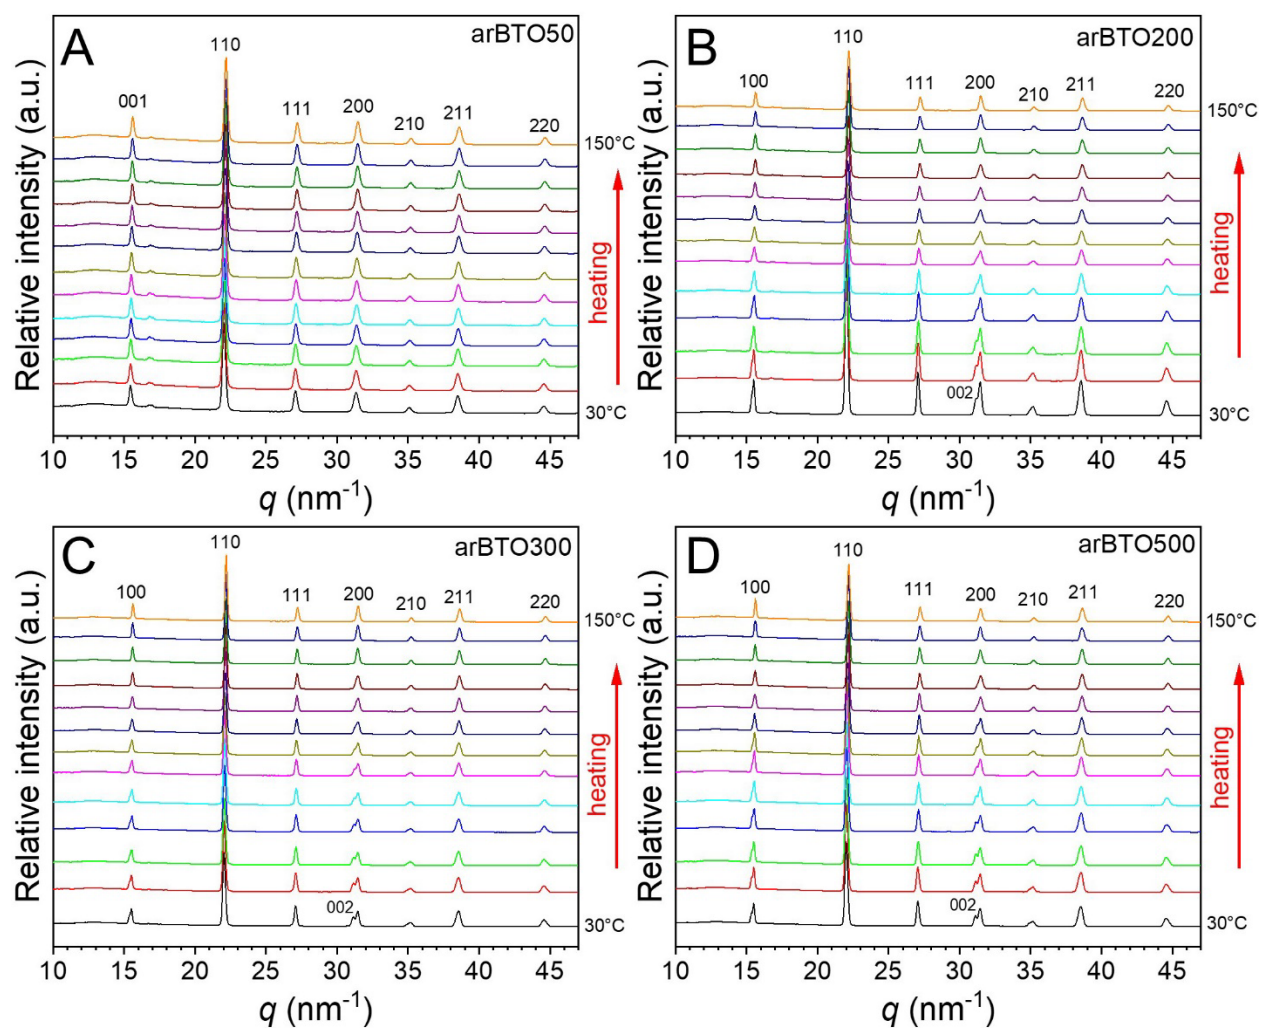

**Fig. S13.** Temperature-dependent XRD for (A) arBTO50, (B) arBTO200, (C) arBTO300, and (D) arBTO500.

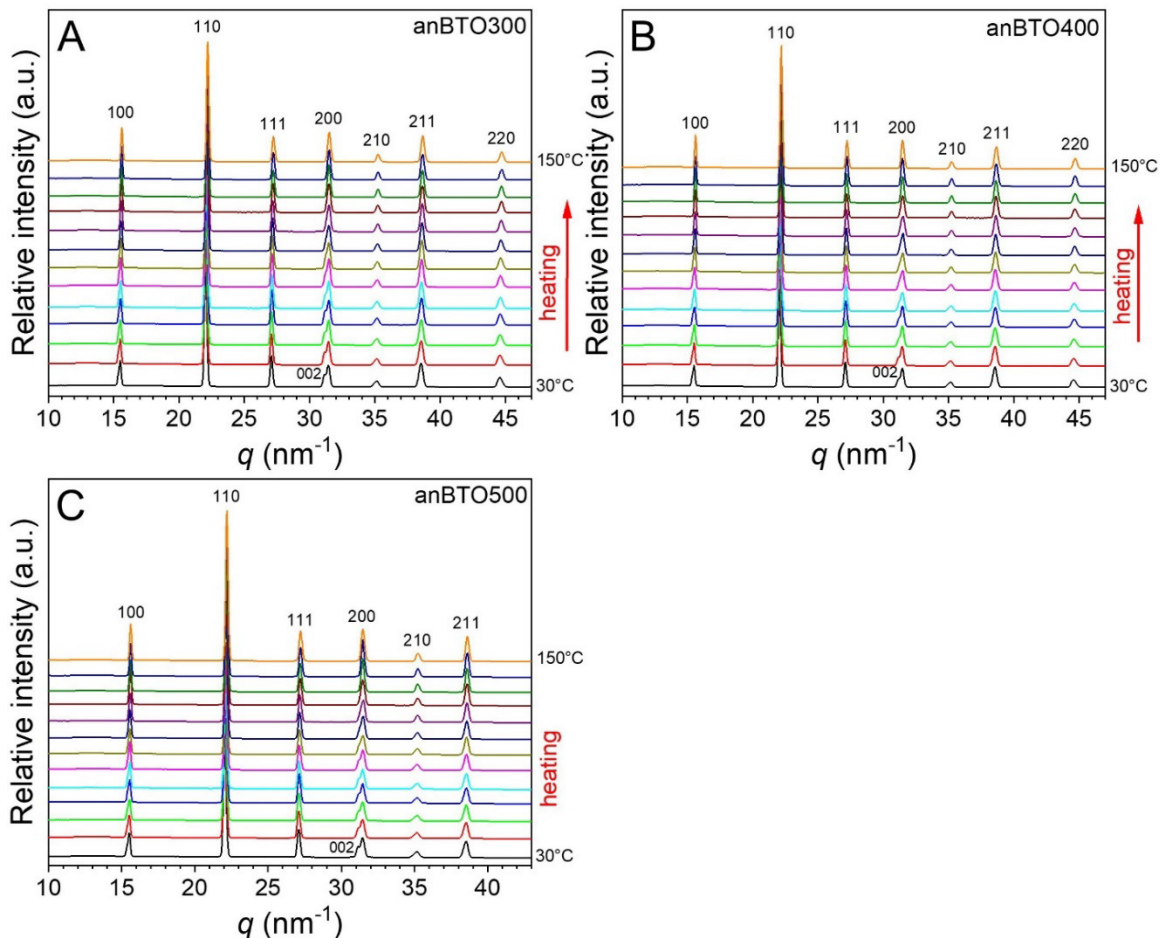

**Fig. S14.** Temperature-dependent XRD for (A) anBTO300, (B) anBTO400, and (C) anBTO500.

#### 4. Room-temperature Raman of arBTO nanocrystals

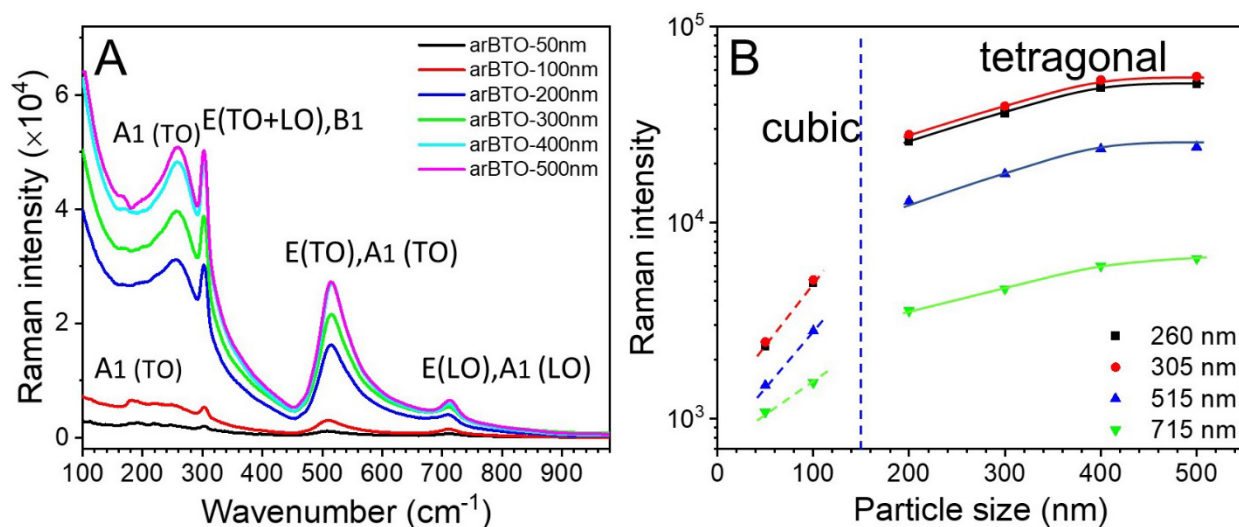

**Fig. S15.** (A) Raman spectra for arBTO50-arBTO500 nanocrystals in the ambient environment and corresponding peak intensities versus nominal particle size.

## 5. DSC results of BaTiO<sub>3</sub> single crystal and cooling DSC curves of BTO nanocrystals

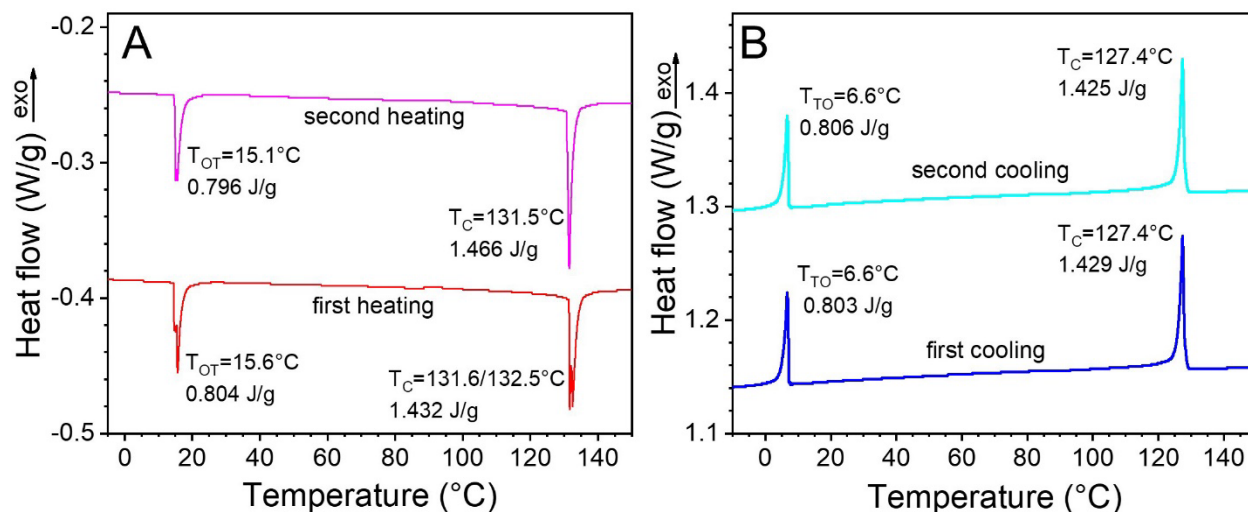

**Fig. S16.** (A) Heating and (B) cooling DSC curves of the BaTiO<sub>3</sub> (001)-single crystal. The heating and cooling rates were 10 °C/min. The sample weight was 10.65 mg.

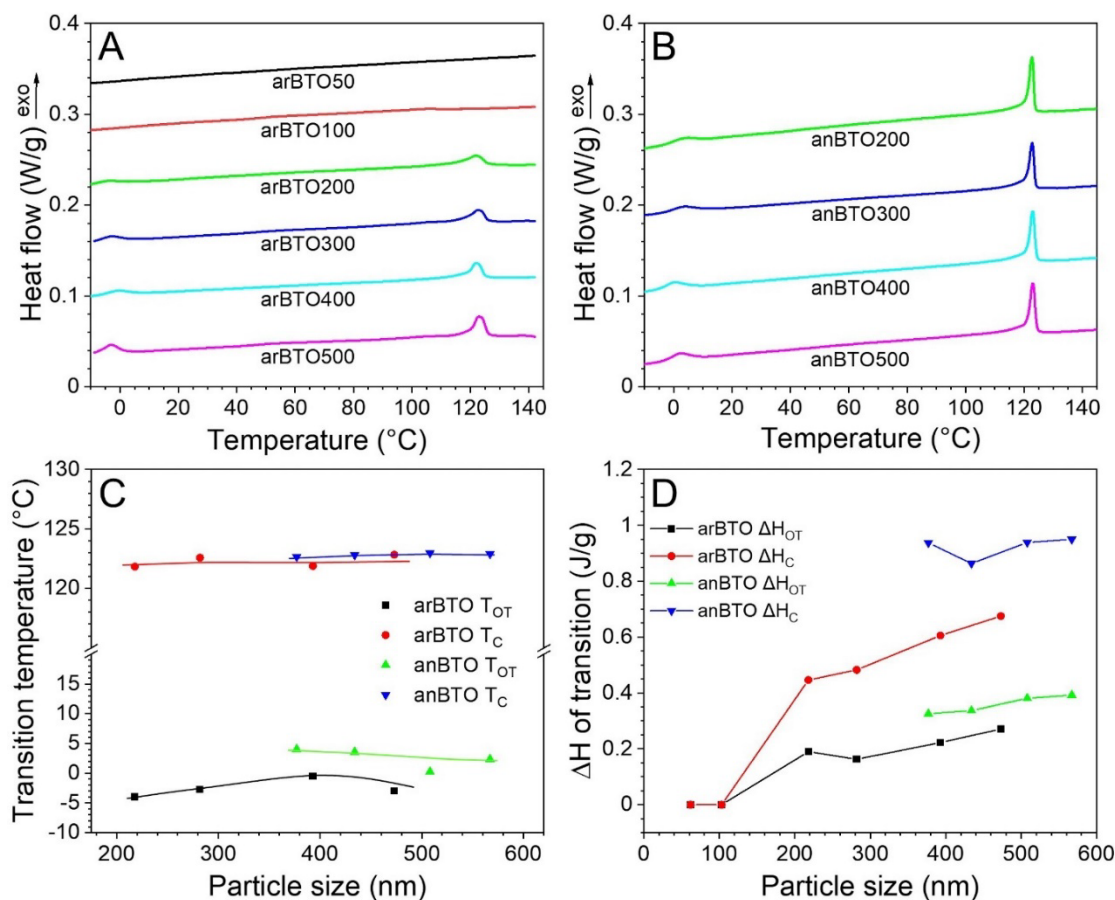

**Fig. S17.** Cooling DSC curves of (A) arBTO50-arBTO500 and (B) anBTO200-anBTO500 nanocrystals with (C) phase transition temperatures, and (D) heats of transition ( $\Delta H$ ) as a function of the actual particle size.

## 6. XPS analysis of arBTO and anBTO nanocrystals

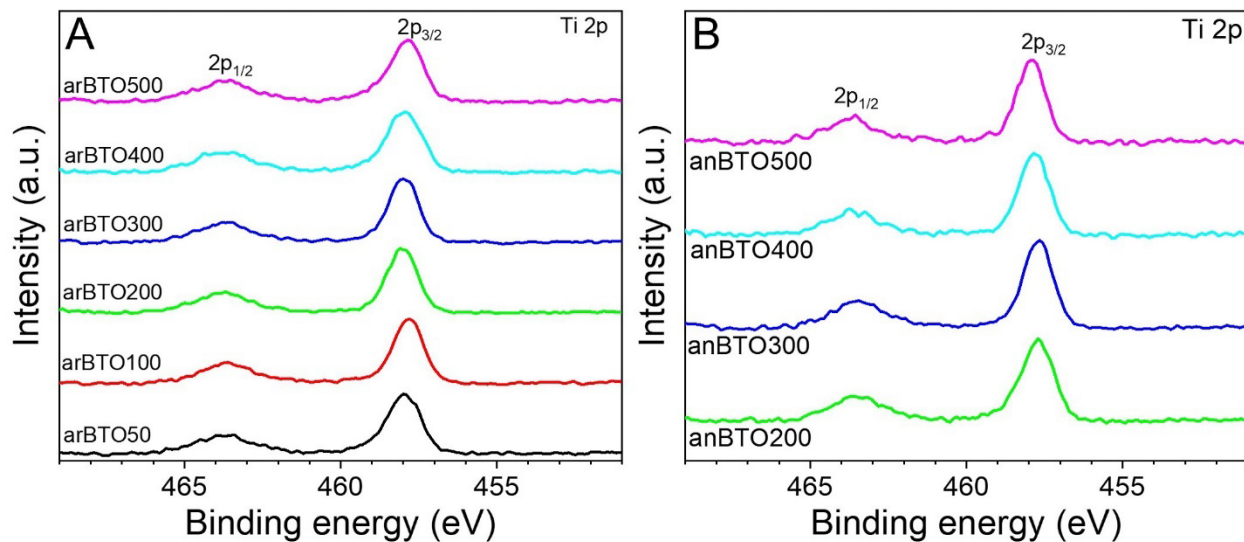

**Fig. S18.** XPS spectra of Ti 2p peaks for (A) arBTO50-arBTO500 and (B) anBTO200-anBTO500 nanocrystals.

## 7. High-resolution TEM analysis of arBTO and anBTO nanocrystals

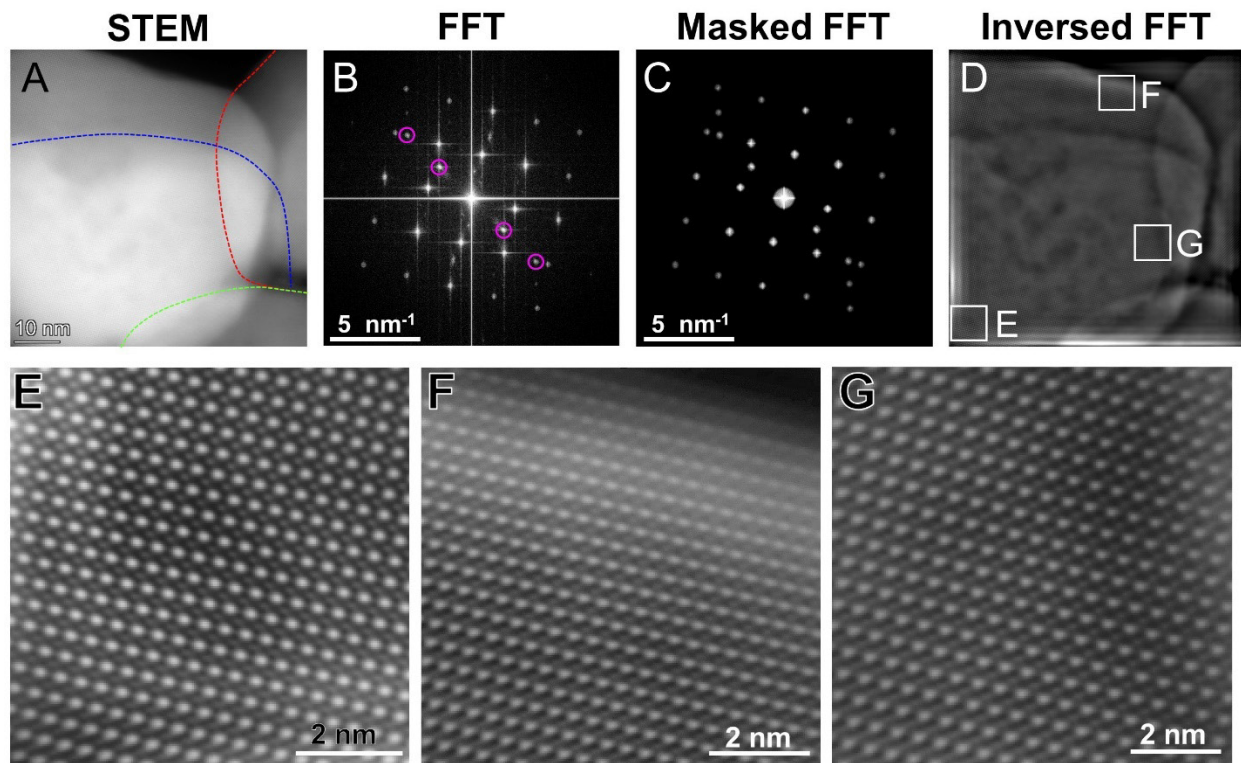

**Fig. S19.** (A) HAADF STEM micrograph of arBTO50 nanocrystals with (B) FFT pattern, (C) masked FFT pattern, and (D) corresponding inverted FFT image. The (E, F, G) enlarged atomic resolution images are from the white square areas in (D).

The clean diffraction pattern and the iFFT from the same nanoparticle collectively showed that the BTO nanoparticle should be single crystalline. The underlying nanoparticles, which partially overlapped with the primary particle, were marked with dashed lines of different colors in Fig. S19A. By performing the corresponded FFT of the nanoparticle clusters (Fig. S19B), only one extra set of diffraction spots were identified and marked with purple circles, indicating another nanoparticle is close to a diffraction zone. Next, the identified spots were masked (Fig. S19C) and used to generate the iFFT image. Then, brightness and contrast were adjusted to increase the visibility of atom columns (Fig. S19D). Although four nanoparticles could be identified in the iFFT image, only the primary nanoparticle in view and the nanoparticle on its right (originally marked with red dash line) had lattice fringes correlates to (100) planes of cubic BaTiO<sub>3</sub>. Hence, the particle with red dash lines was close to a diffraction zone to present the circled diffraction spots in Fig. S19B. In addition, with enlarged areas from the different regions of the primary particle (Figs. S19E-G), the unit cells were aligned in the same direction, further proving the single crystalline BaTiO<sub>3</sub> nanocrystal.

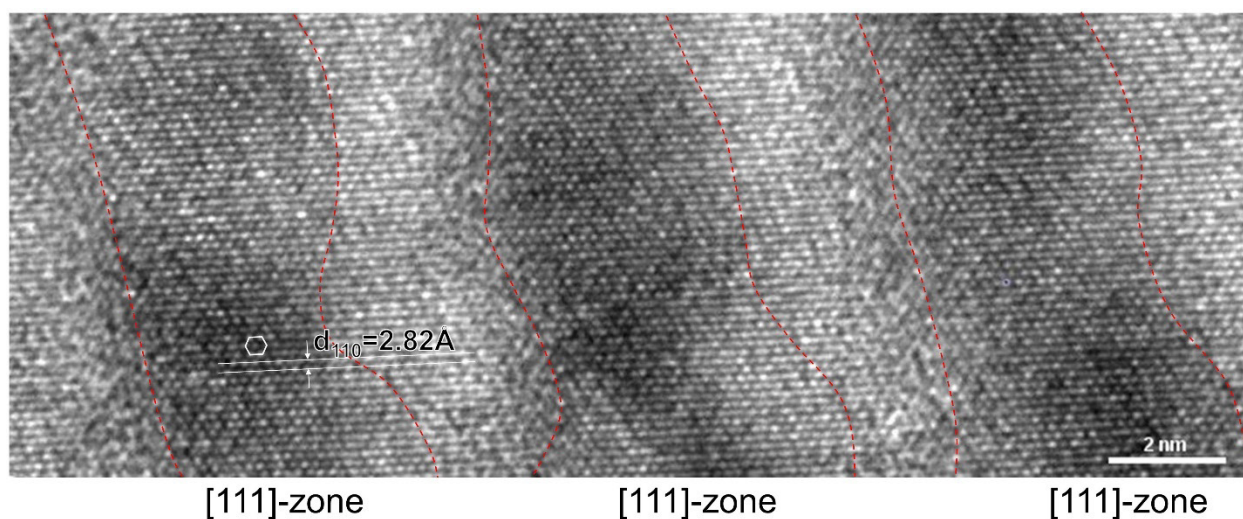

**Fig. S20.** Enlarged HRTEM of arBTO200 nanocrystal.



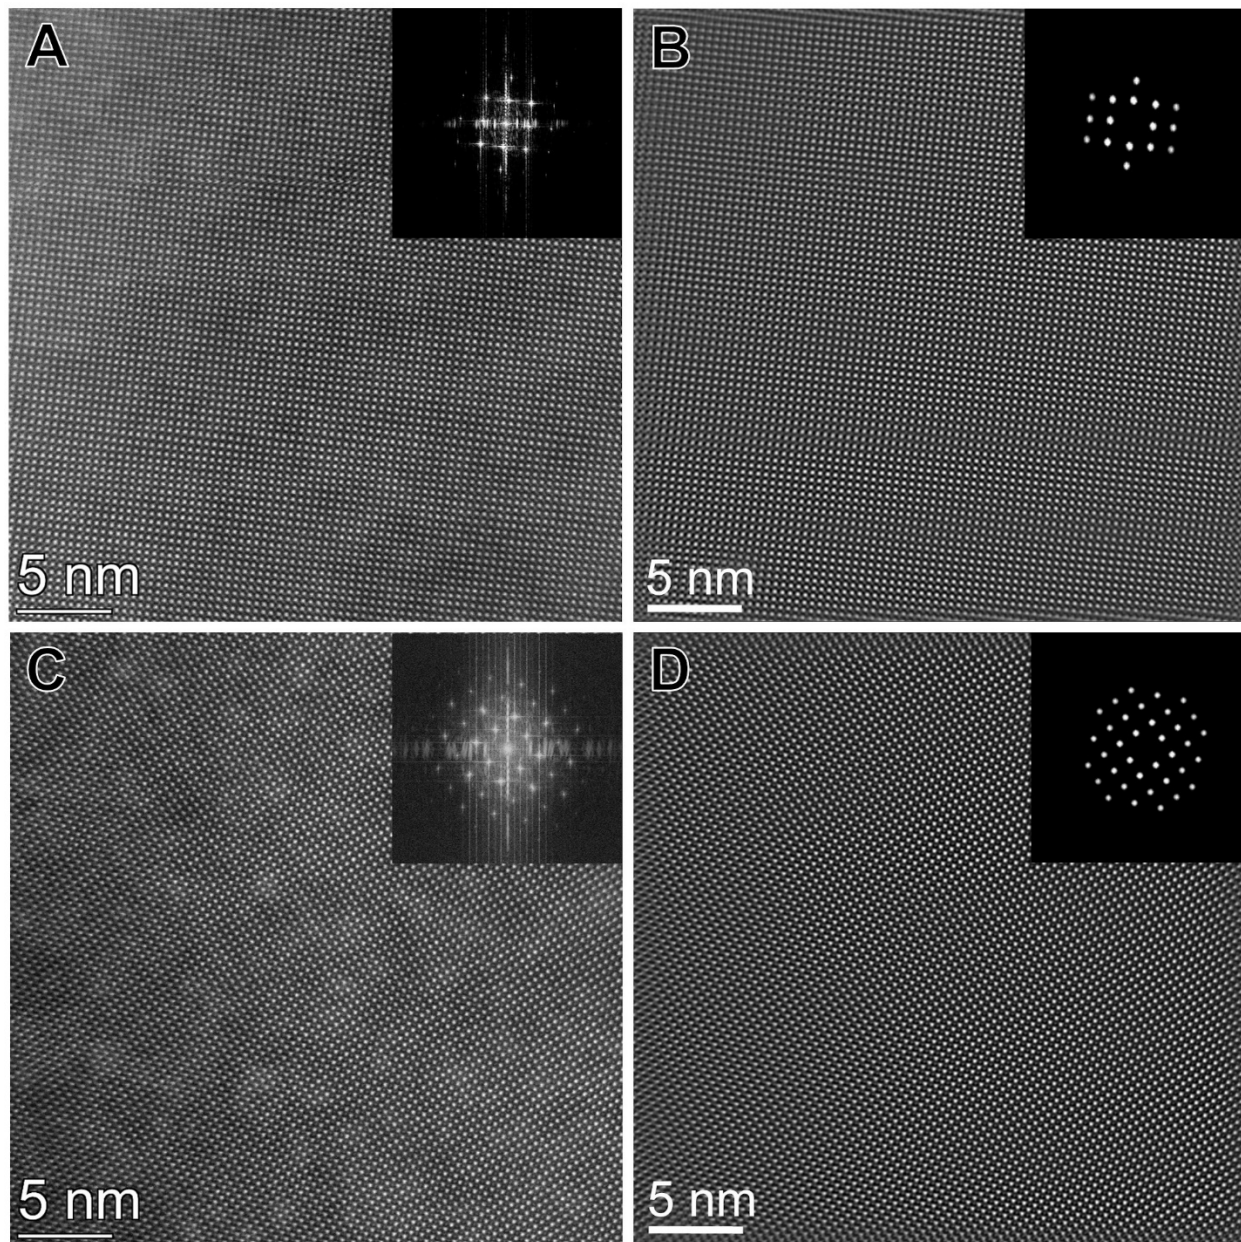

**Fig. S21.** STEM HAADF micrographs of (A) arBTO200 and (C) anBTO200 nanocrystals with the FFT pattern as insets, and (B, D) iFFT images of (A) and (C) with masked FFT as insets.

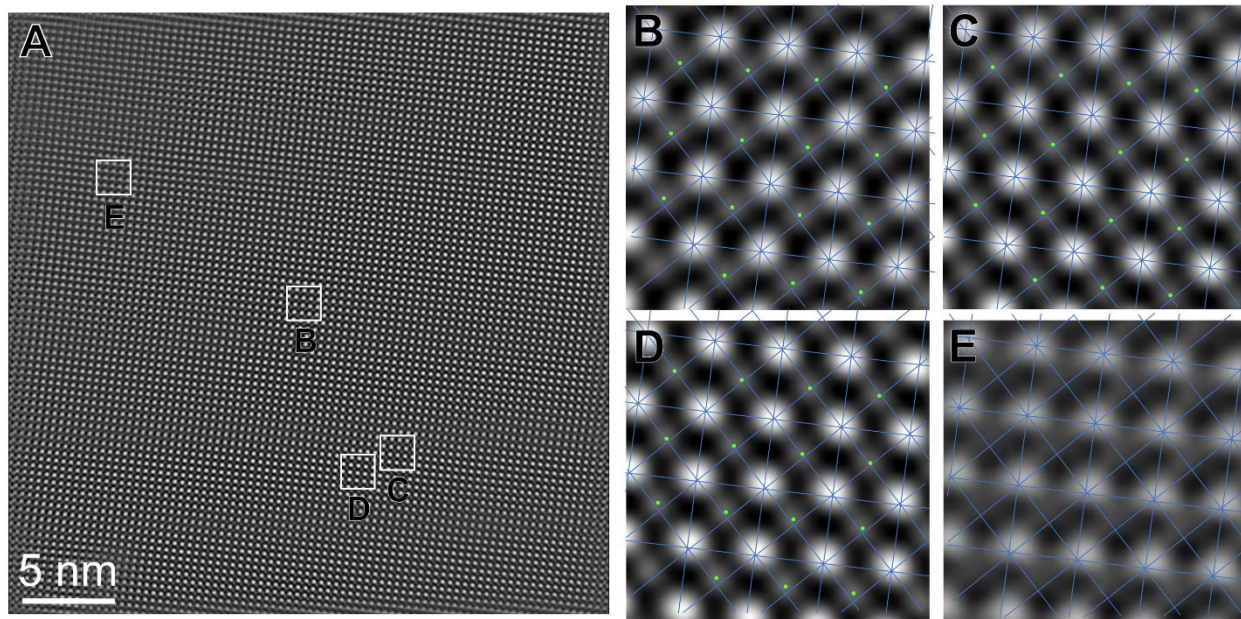

**Fig. S22.** (A) iFFT image of an arBTO200 nanocrystal and (B-E) enlarged atomic resolution images of selected areas in (A).

## 8. Linear dielectric properties by BDS

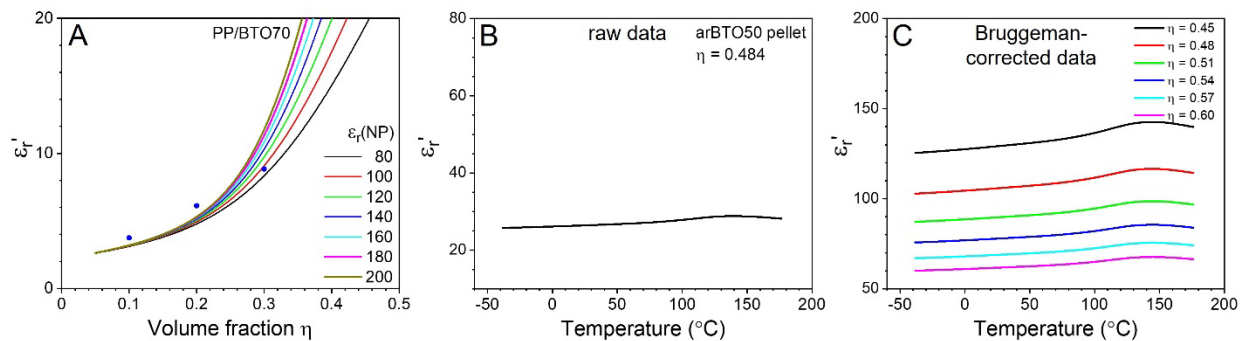

**Fig. S23.** (A) Dielectric constant ( $\epsilon_r'$ ) versus volume fraction ( $\eta$ ) for the PP/BTO70 (70 nm BTO particles) nanocomposites with  $\eta = 0.10, 0.20,$  and  $0.30$ . Bruggeman lines with different BTO dielectric constants from 80 to 200 are shown. (B) Temperature-scan  $\epsilon_r'$  for the arBTO50 pellet. (C) Bruggeman-corrected  $\epsilon_r'$  curves for the arBTO50 particles with different packing fractions from 0.45 to 0.60.

without Au coating

with Au coating

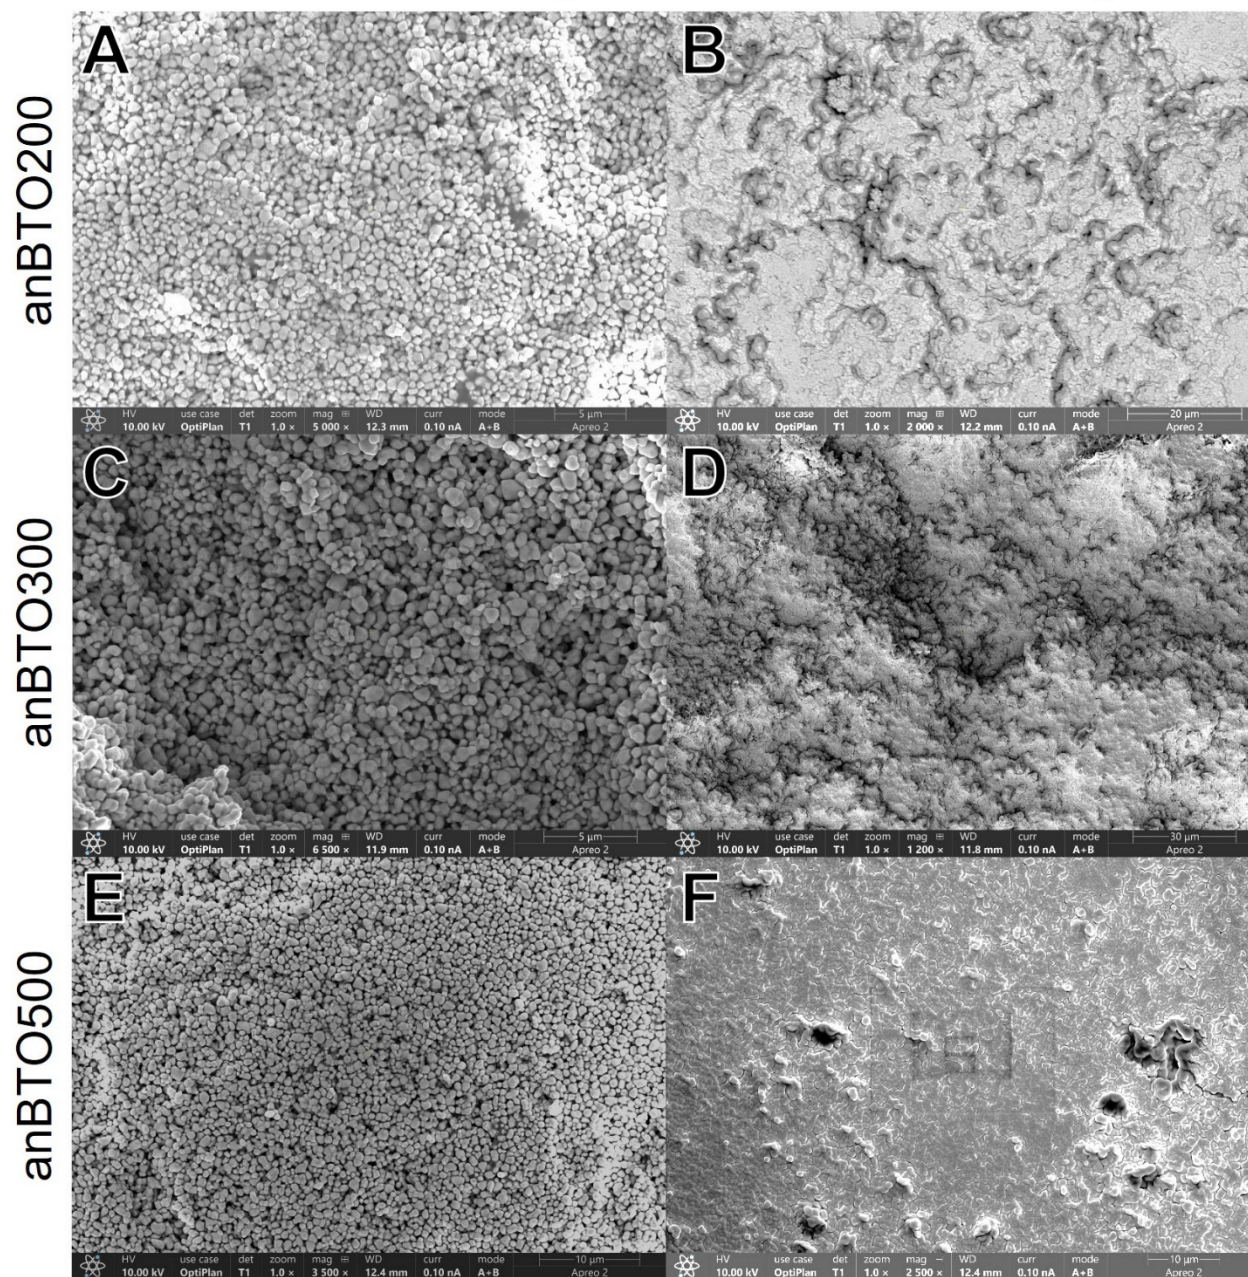

**Fig. S24.** SEM micrographs for (A,B) anBTO200, (C,D) anBTO300, and (E,F) anBTO500 (A,C,E) without and (B,D,F) with gold (Au) coating.

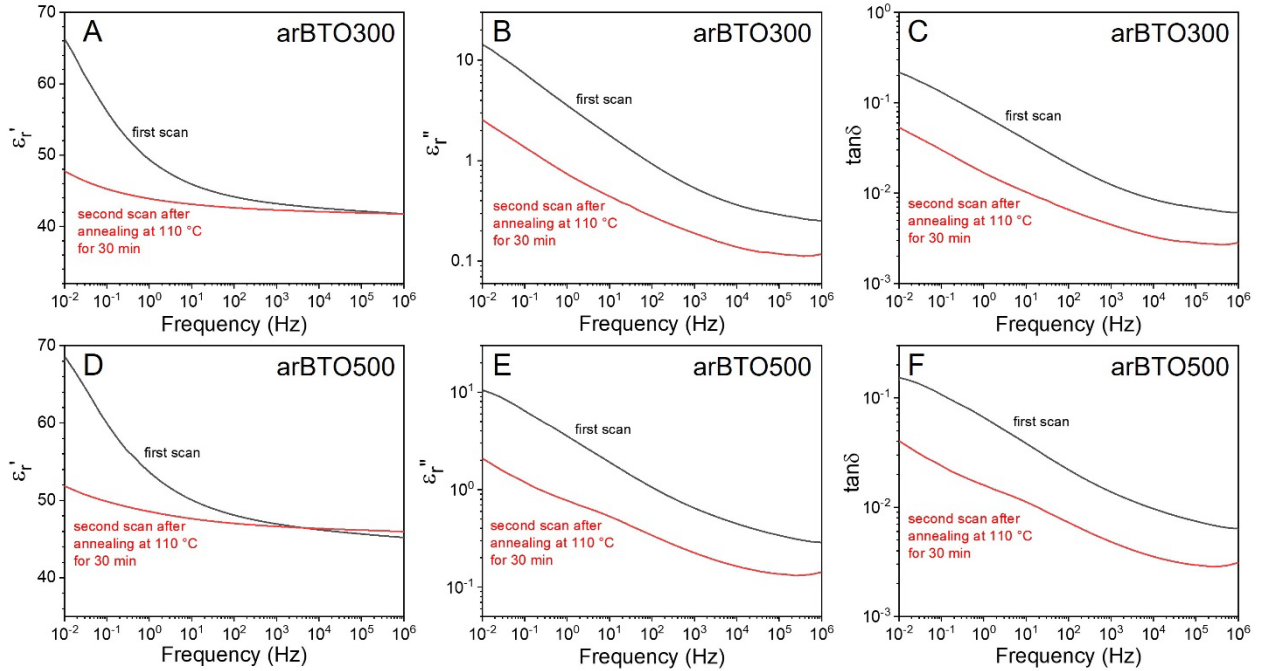

**Fig. S25.** Frequency-scan BDS results of (A,D)  $\epsilon_r'$ , (B,E)  $\epsilon_r''$ , and (C,F)  $\tan\delta$  for (A-C) arBTO300 and (D-F) arBTO500 before and after annealing at 110 °C to remove moisture.

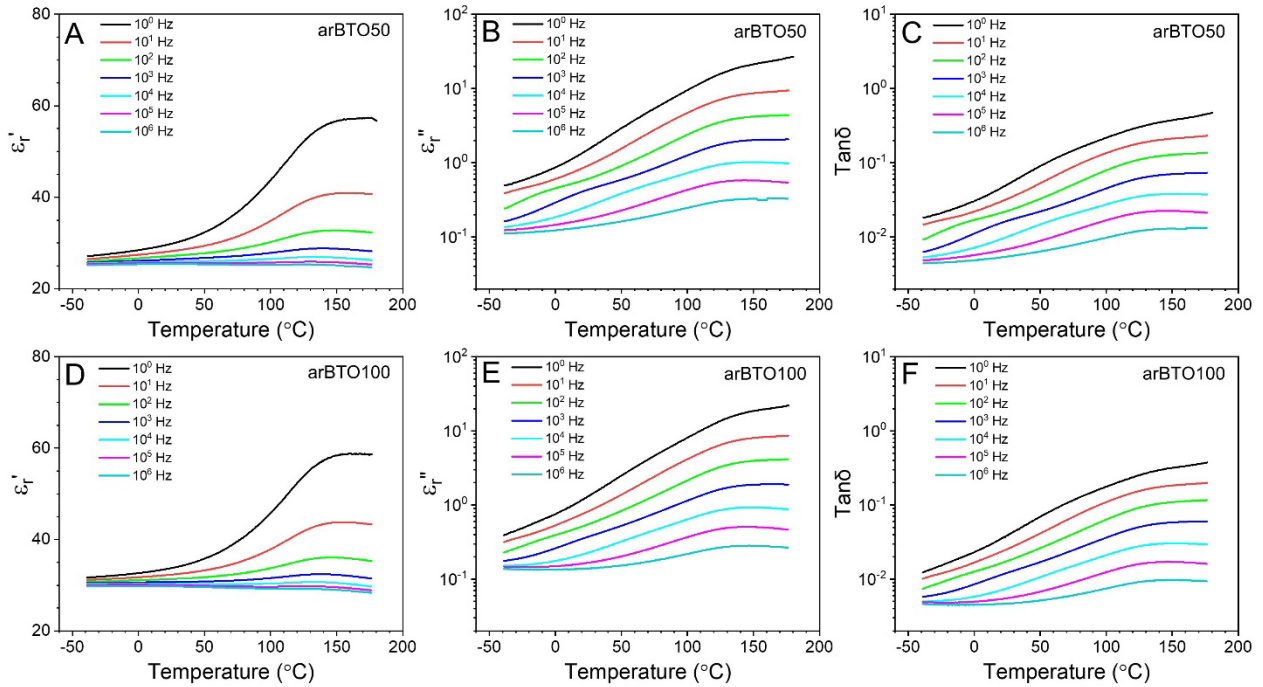

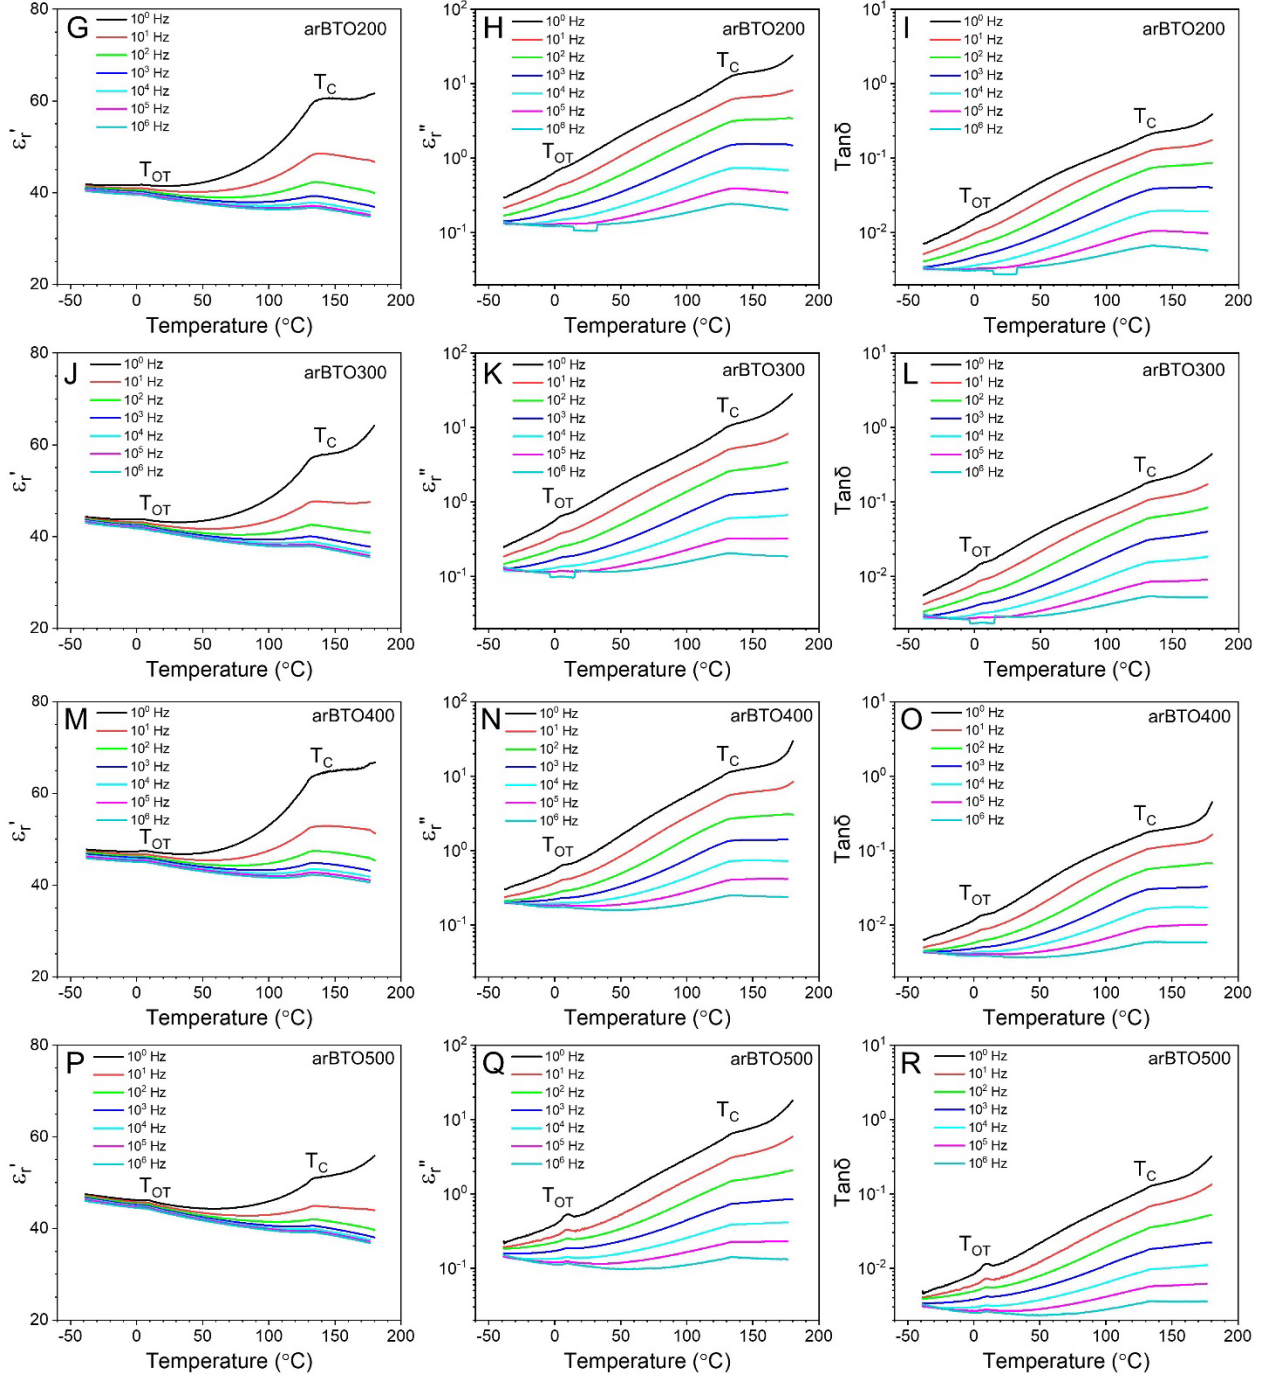

**Fig. S26.** Temperature-scan BDS results of (A,D,G,J,M,P)  $\epsilon_r'$ , (B,E,H,K,N,Q)  $\epsilon_r''$ , and (C,F,I,L,O,R)  $\tan\delta$  for the hydraulic-pressed arBTO-silicone rubber composites containing (A-C) arBTO50, (D-F) arBTO100, (G-H) arBTO200, (I-K) arBTO300, (L-N) arBTO400, and (O-R) arBTO500 under different frequencies.

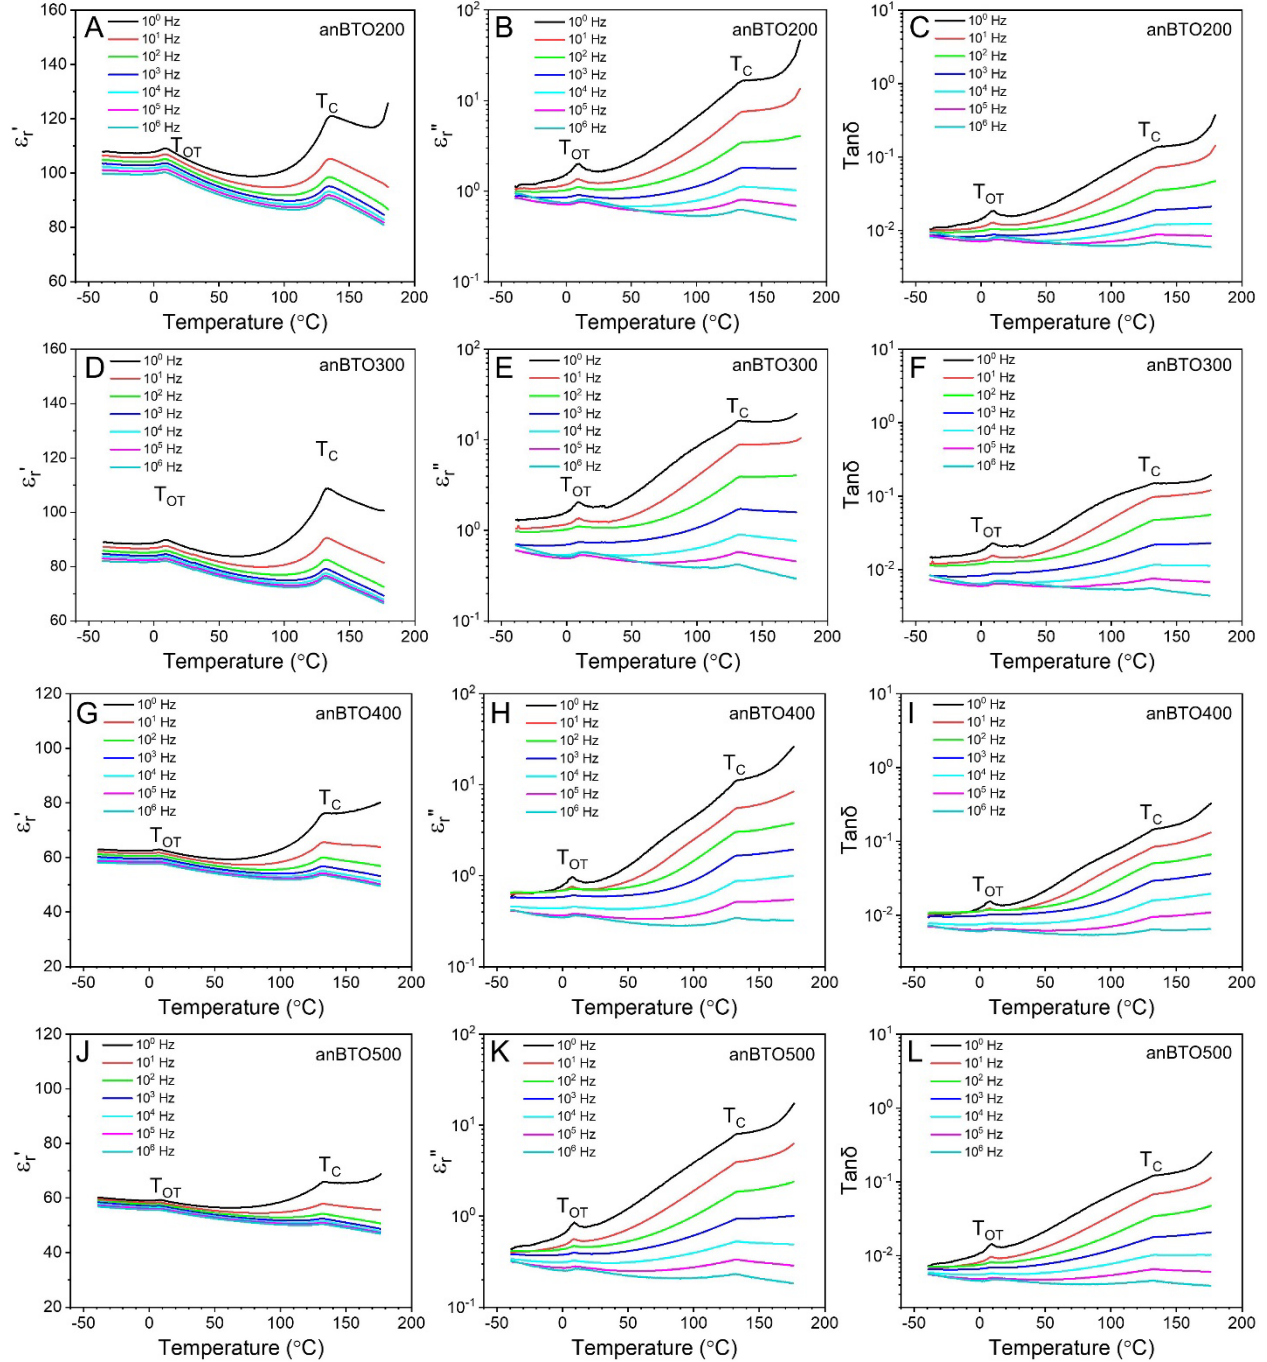

**Fig. S27.** Temperature-scan BDS results of (A,D,G,J)  $\epsilon_r'$ , (B,E,H,K)  $\epsilon_r''$ , and (C,F,I,L)  $\tan\delta$  for the hydraulic-pressed anBTO-silicone rubber composites containing (A-C) anBTO200, (D-F), anBTO300, (G-H) anBTO400, and (I-K) anBTO500 under different frequencies.

In these figures, the increased  $\epsilon_r'$ ,  $\epsilon_r''$ , and  $\tan\delta$  at high temperatures and low frequencies are attributed to the conduction loss from impurity ions, especially at the particle surfaces.

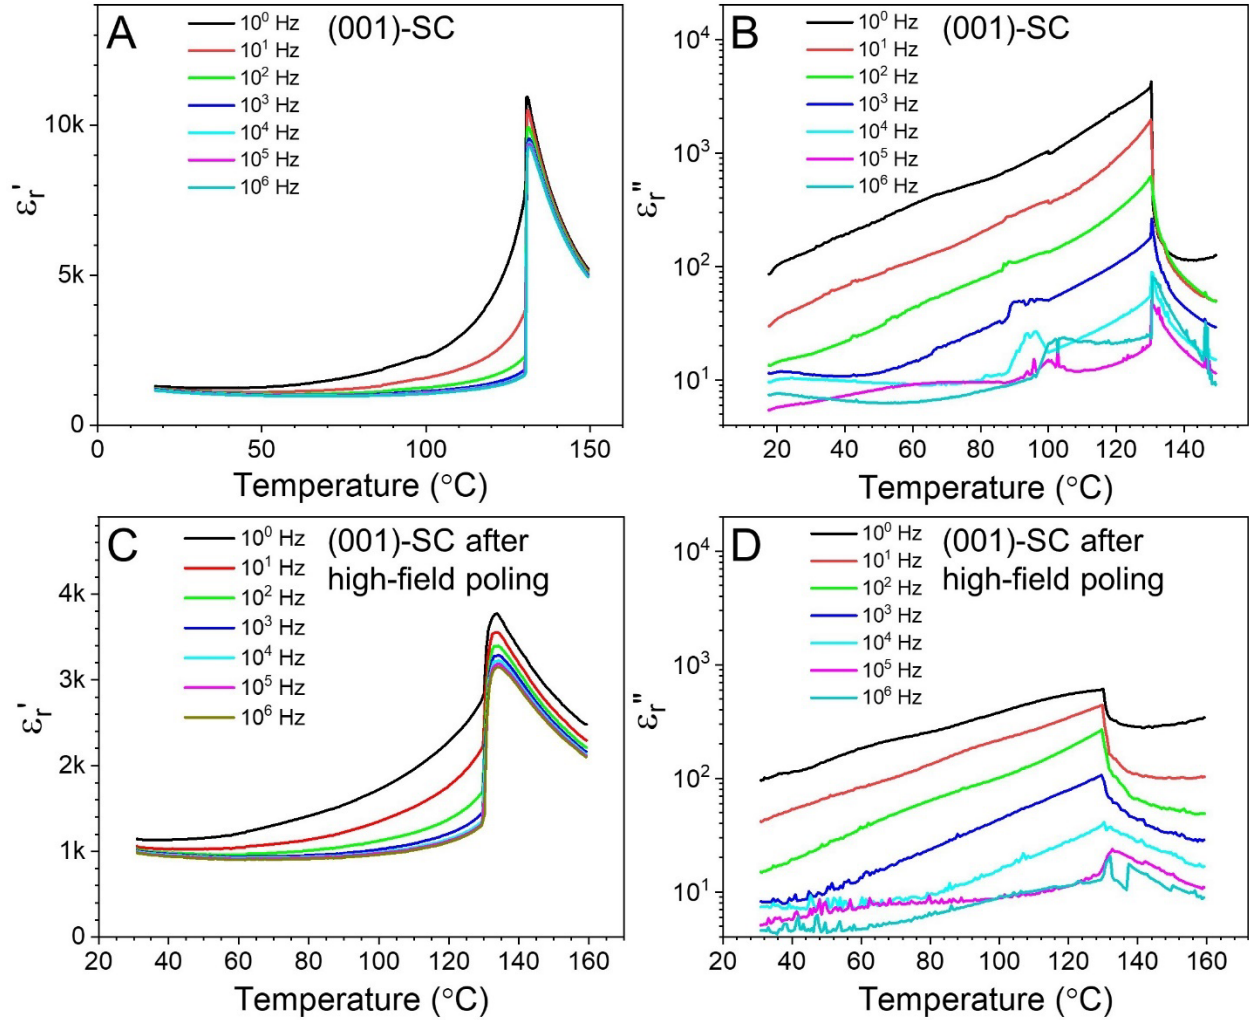

**Fig. S28.** Temperature-scan BDS results of (A,C)  $\epsilon_r'$  and (B,D)  $\epsilon_r''$  for the BaTiO<sub>3</sub> (001)-single crystal (SC) before and after high-field electric poling (up to 3 MV/m at 10 Hz).

The original BaTiO<sub>3</sub> (001)-single crystal exhibited high dielectric constant due to the multidomain nature (Fig. 28A). After repeated electric poling up to 3 MV/m at 10 Hz, the number of domains became smaller. As a result, the dielectric constant decreased, as shown in Fig. 28C.
